# Supplementary material for: Design, synthesis, antimicrobial, antibiofilm evaluation and Z / E -isomerization of novel 6-((arylamino)methylene)benzo[ a ] phenazin-5(6 H )-ones induced by organic solvent
Source: Royal Society of Chemistry journal article supplement (doi:10.1039/d3ra05788g), 2023-01-01
Supplement: d3ra05788g1.pdf [file d3ra05788g1.pdf]

Supporting Information

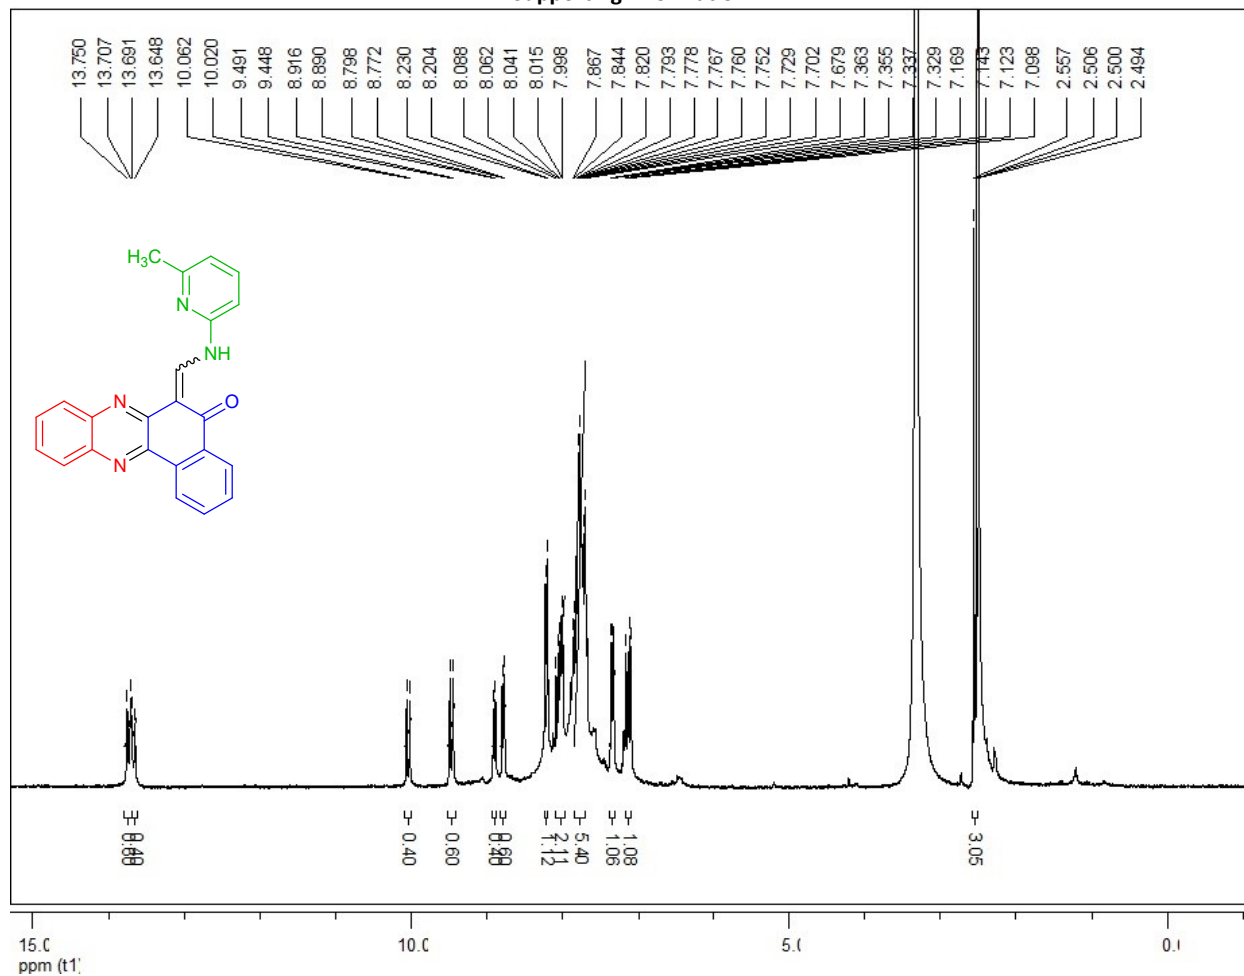

<sup>1</sup>H-NMR spectrum of compound **6a** (300 MHz, DMSO-*d*<sub>6</sub>)

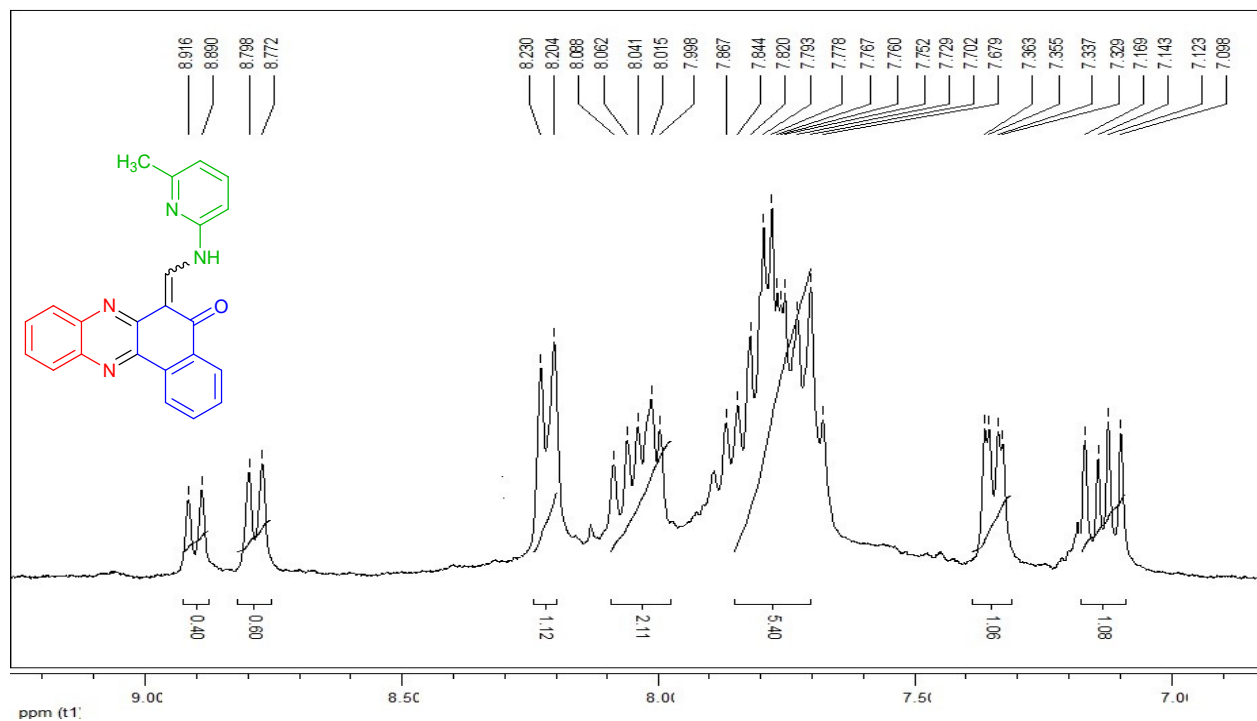

<sup>1</sup>H-NMR spectrum of compound 6a (300 MHz, DMSO-*d*<sub>6</sub>)

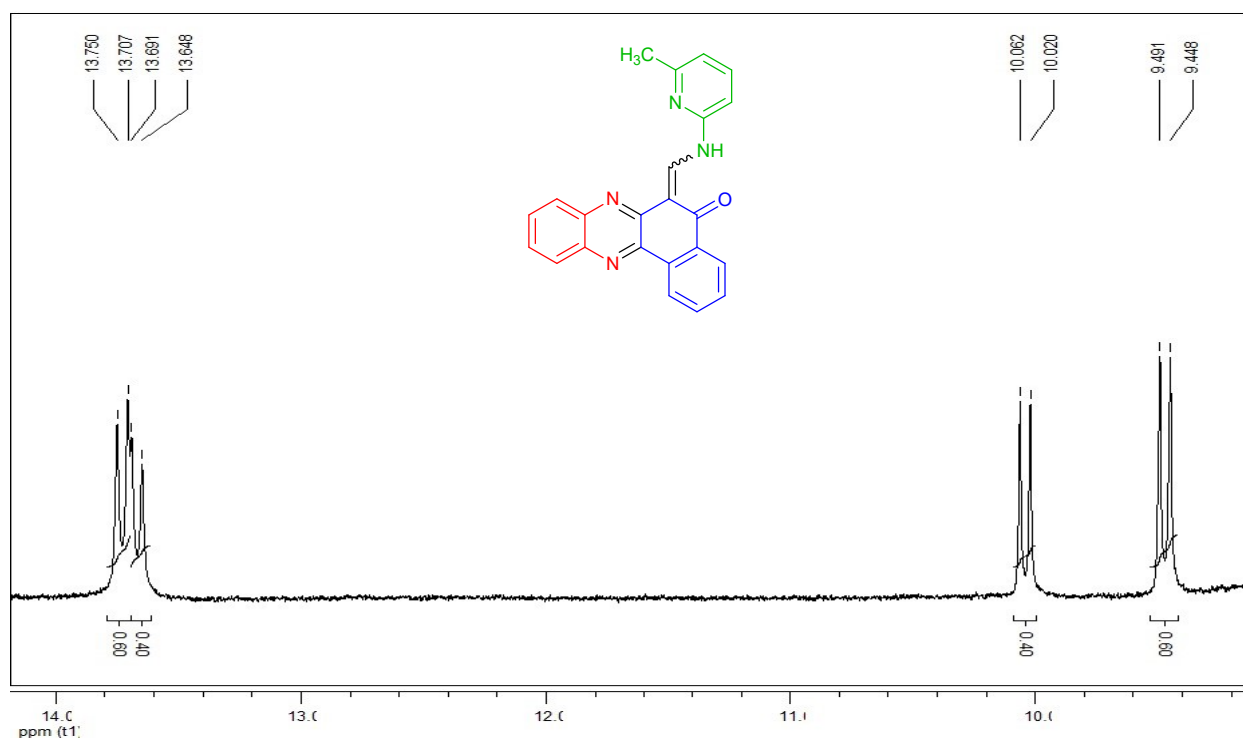

<sup>13</sup>C-NMR spectrum of compound 6a (300 MHz, DMSO-*d*<sub>6</sub>)

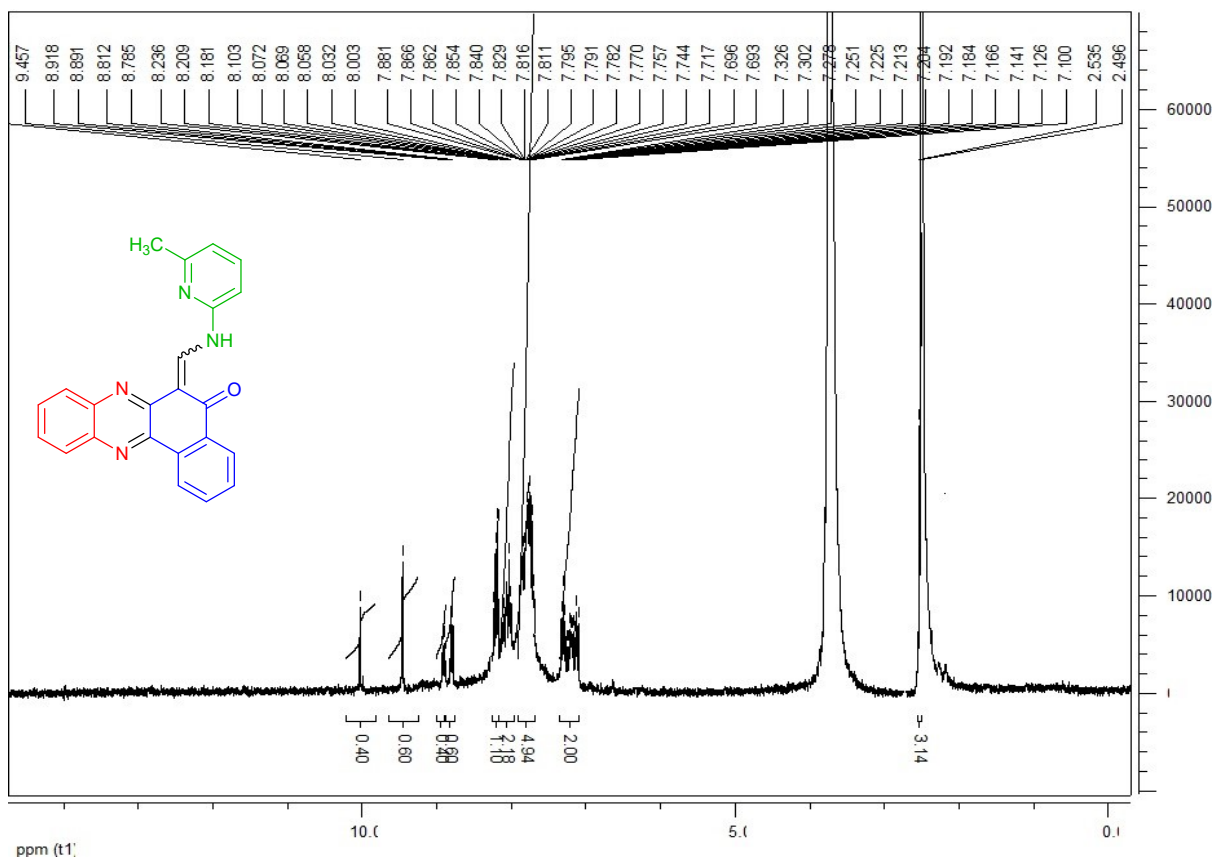

<sup>1</sup>H-NMR spectrum of compound 6a (300 MHz, DMSO-d<sub>6</sub> + D<sub>2</sub>O)

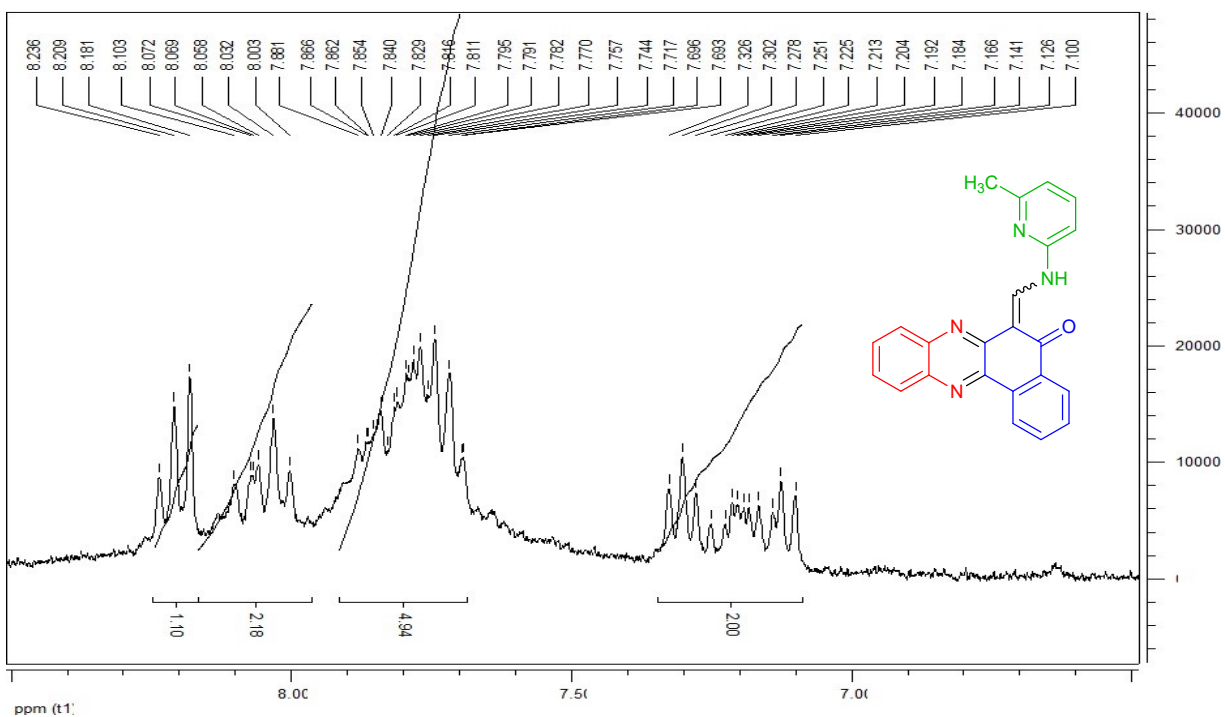

<sup>1</sup>H-NMR spectrum of compound 6a (300 MHz, DMSO-*d*<sub>6</sub> + D<sub>2</sub>O)

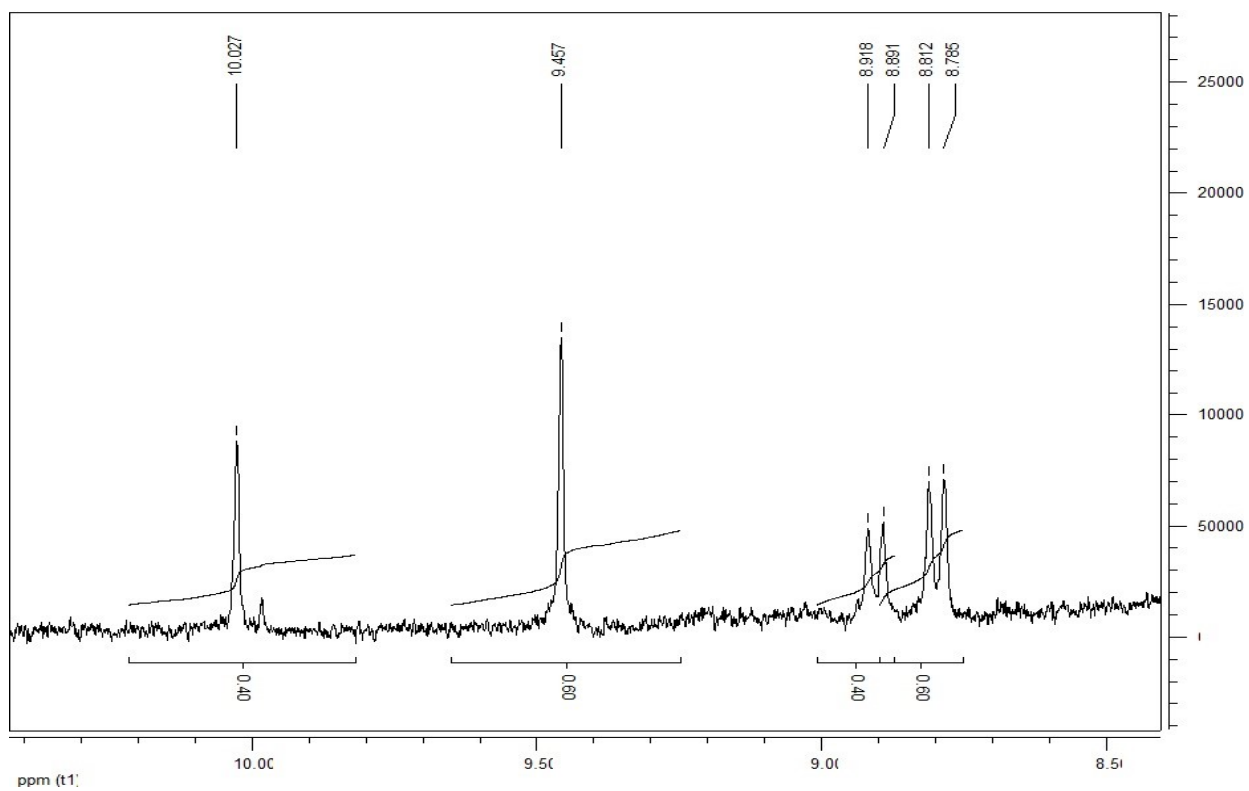

<sup>1</sup>H-NMR spectrum of compound 6a (300 MHz, DMSO-*d*<sub>6</sub> + D<sub>2</sub>O)

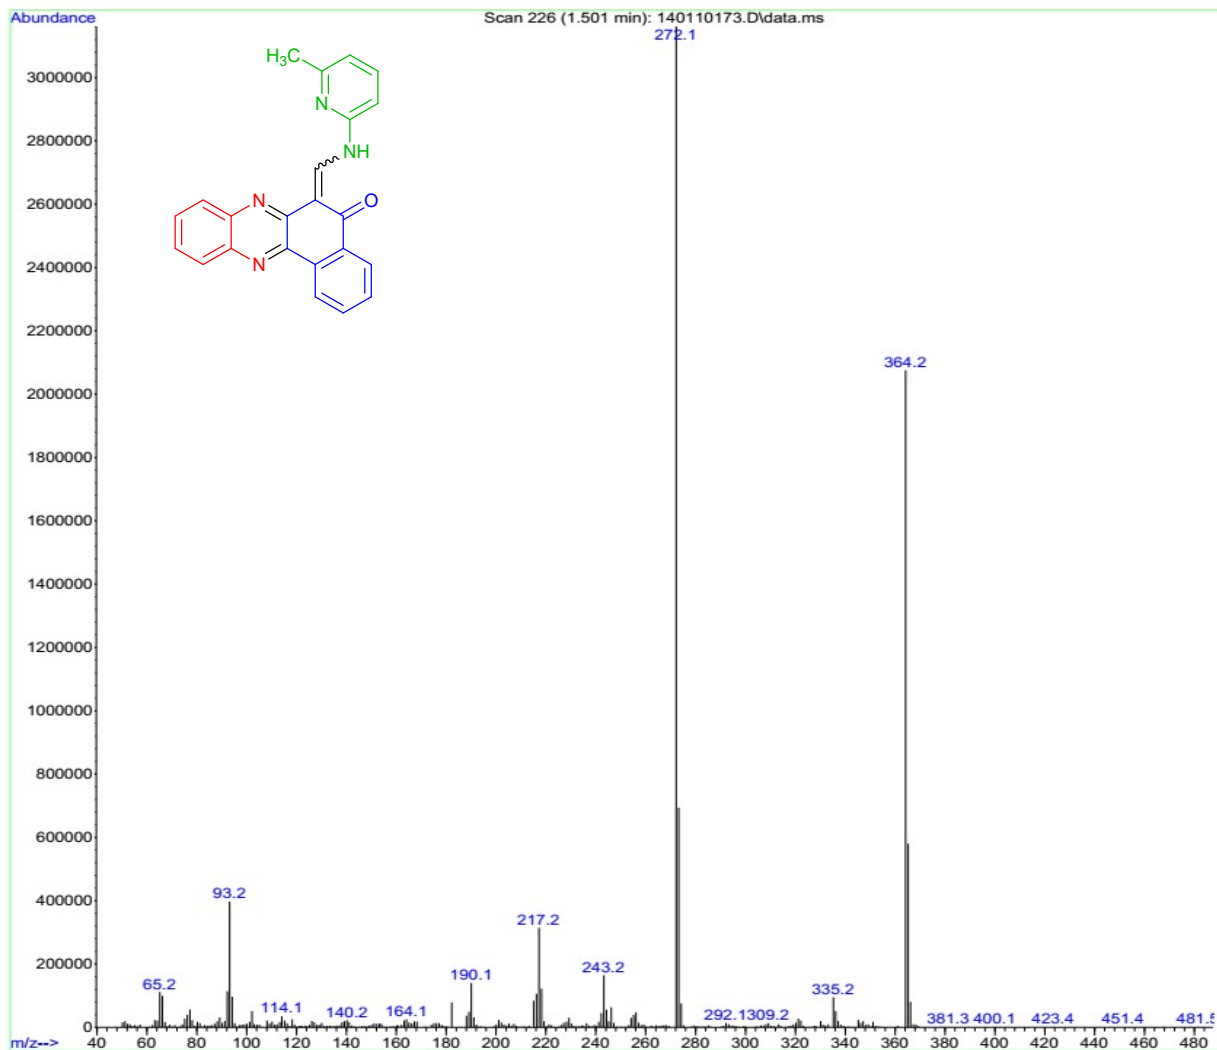

Mass spectrum of compound **6a**



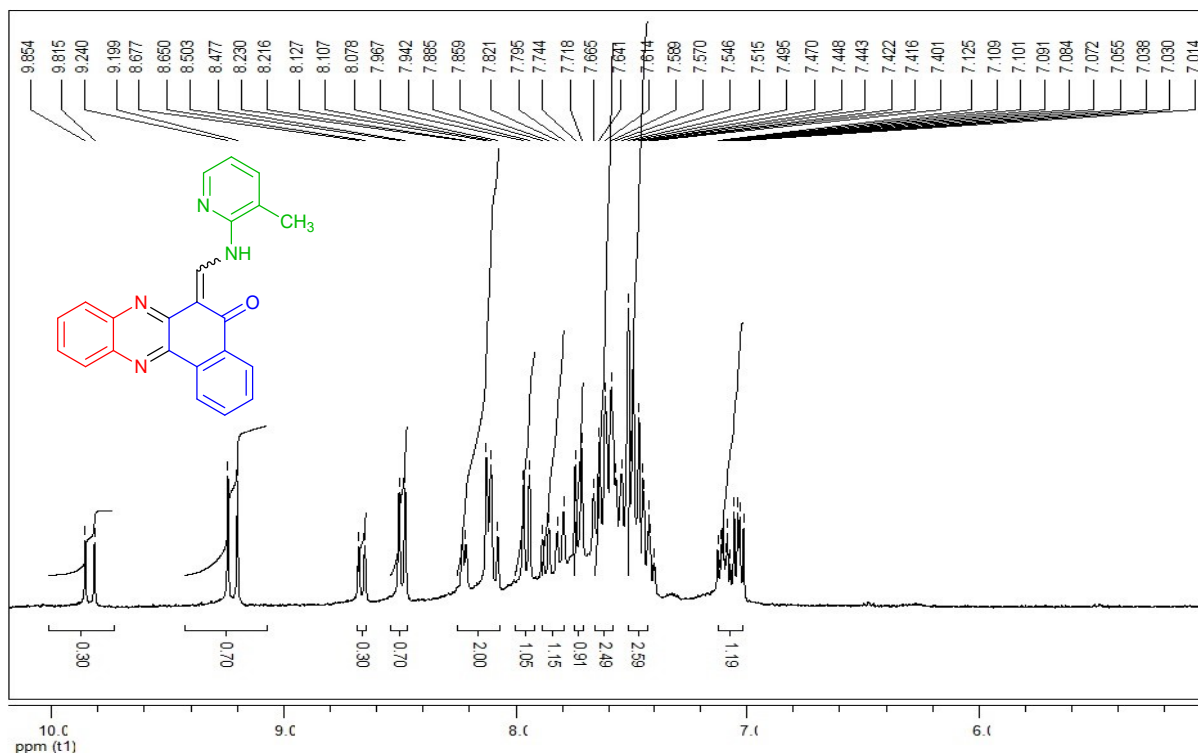

**<sup>1</sup>H-NMR spectrum of compound 6b (300 MHz, DMSO-*d*<sub>6</sub>)**

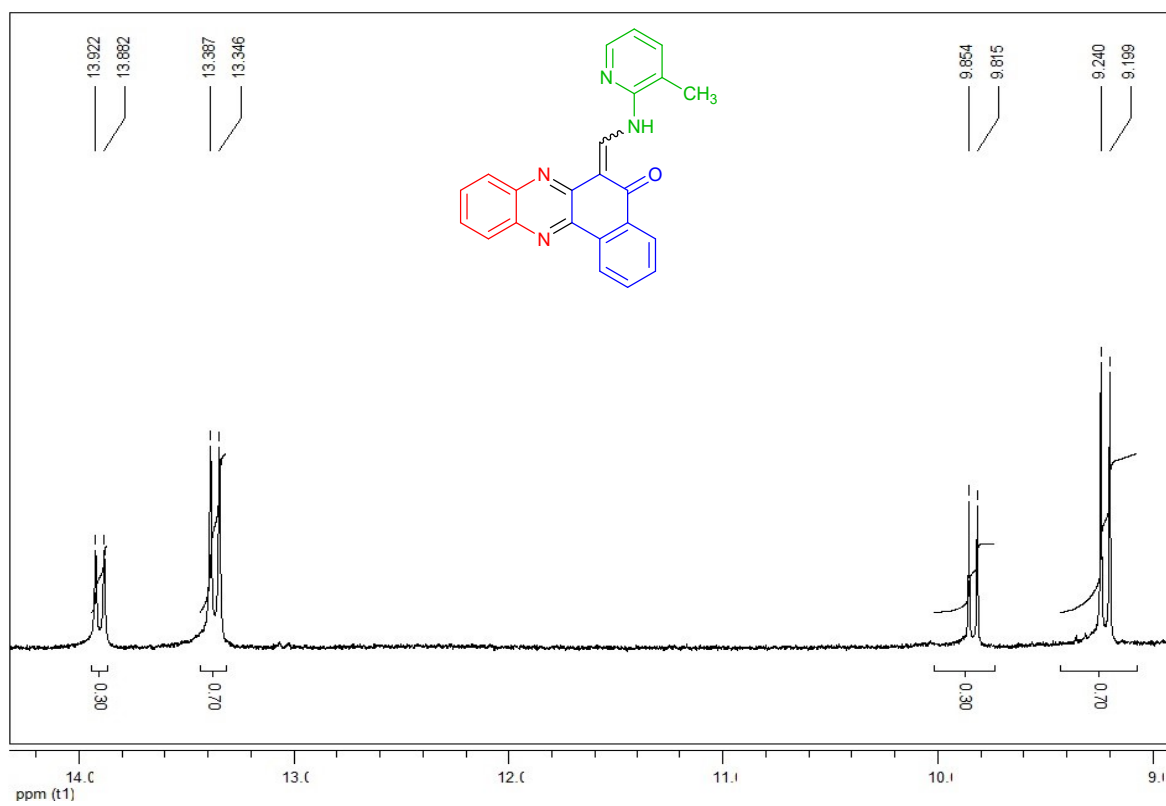

**<sup>13</sup>C-NMR spectrum of compound 6b (300 MHz, DMSO-*d*<sub>6</sub>)**

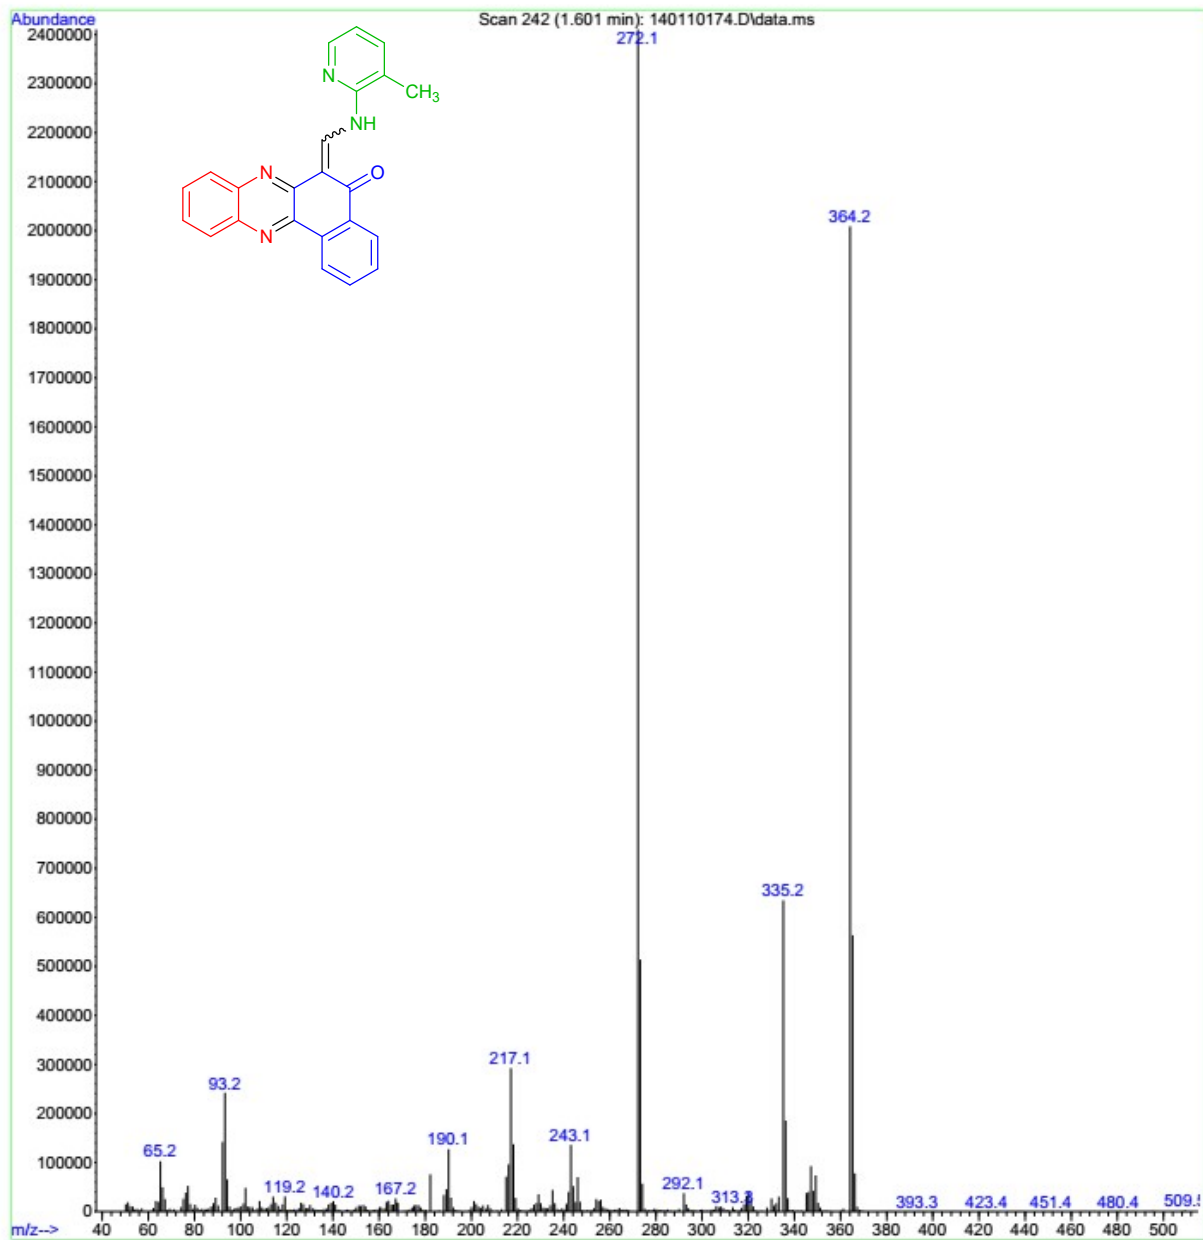

Mass spectrum of compound **6b**



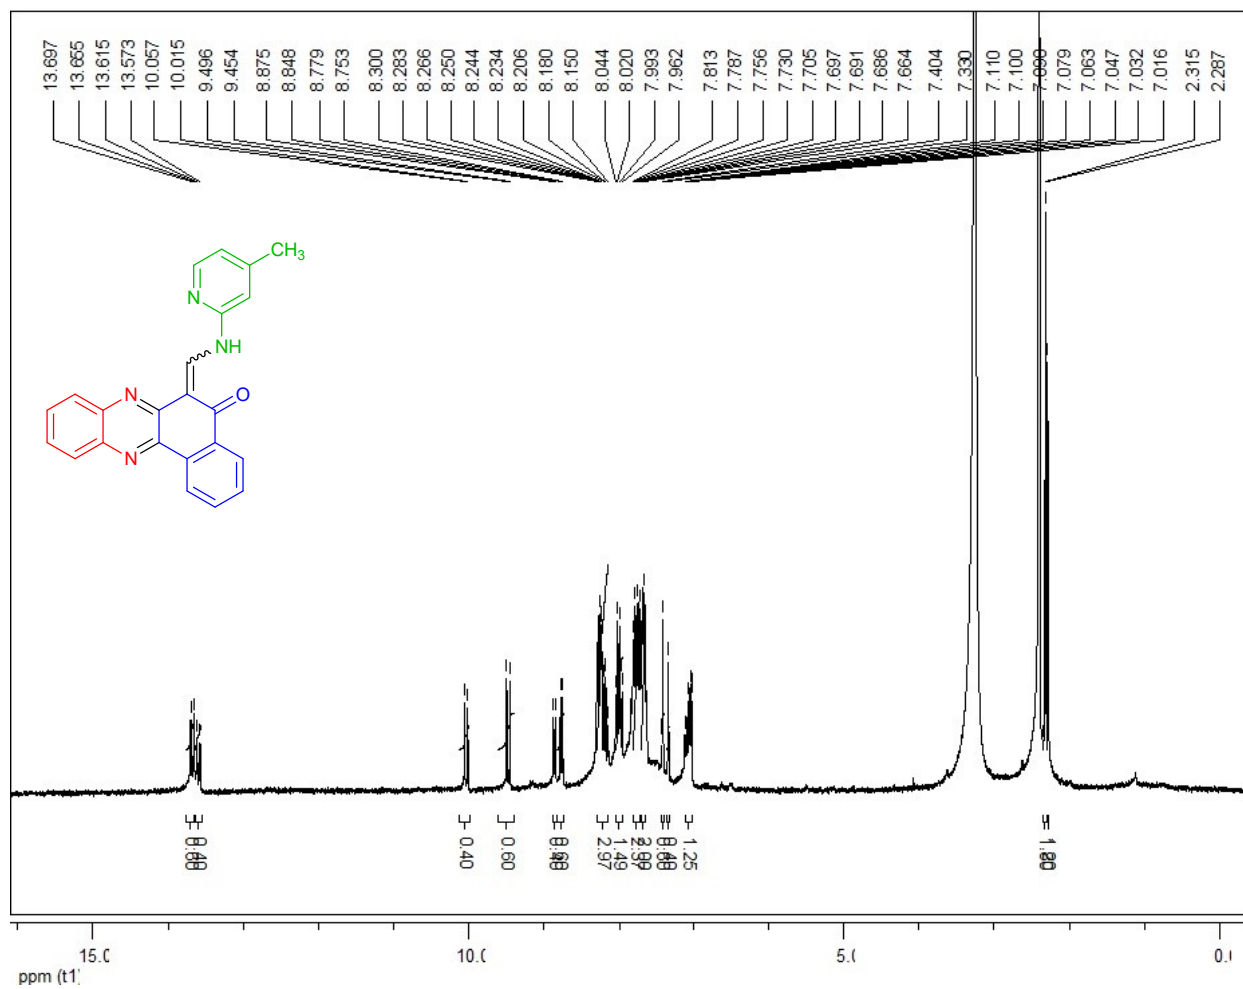

<sup>1</sup>H-NMR spectrum of compound 6c (300 MHz, DMSO-*d*<sub>6</sub>)

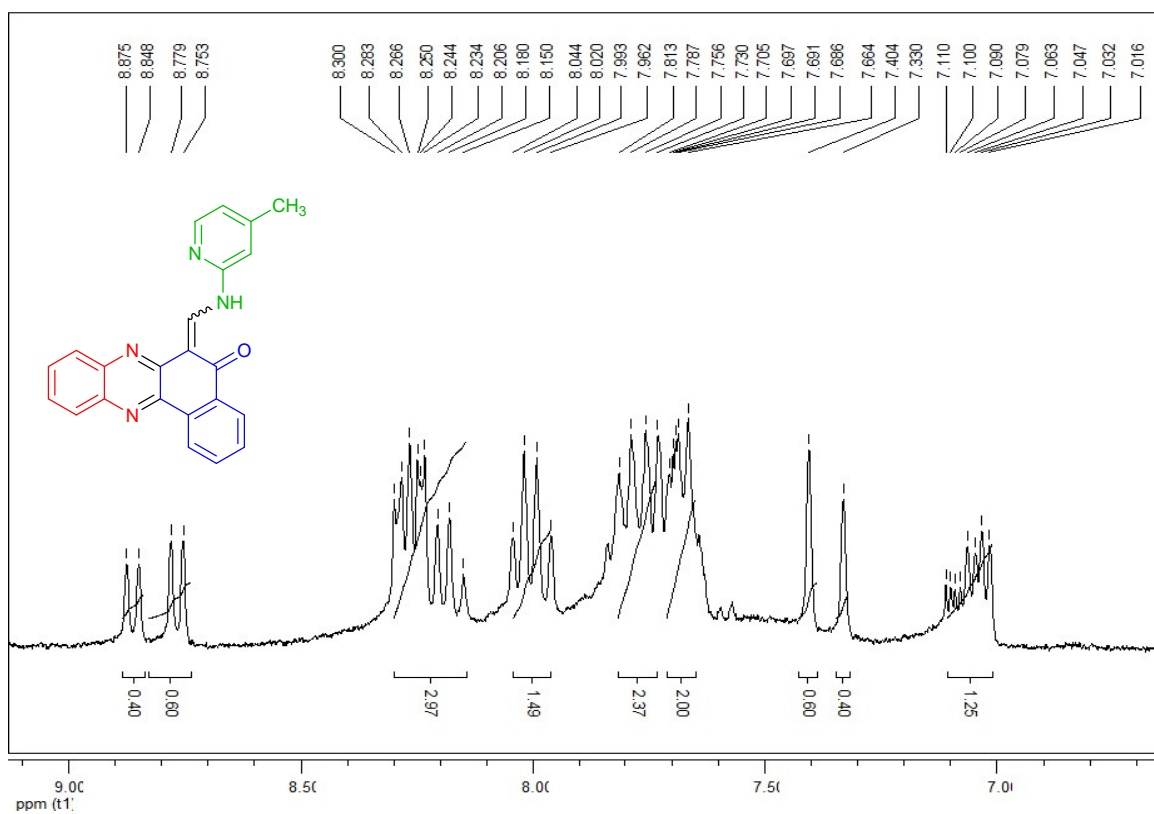

<sup>1</sup>H-NMR spectrum of compound 6c (300 MHz, DMSO-*d*<sub>6</sub>)

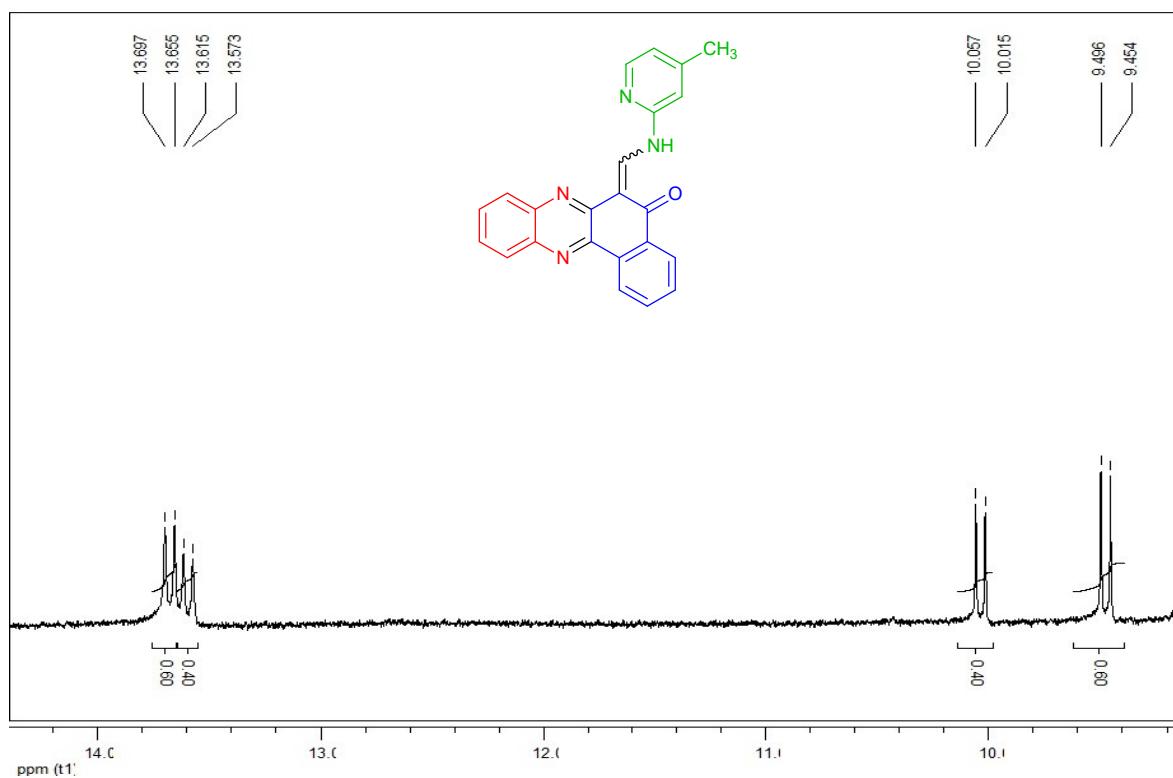

<sup>13</sup>C-NMR spectrum of compound 6c (300 MHz, DMSO-*d*<sub>6</sub>)

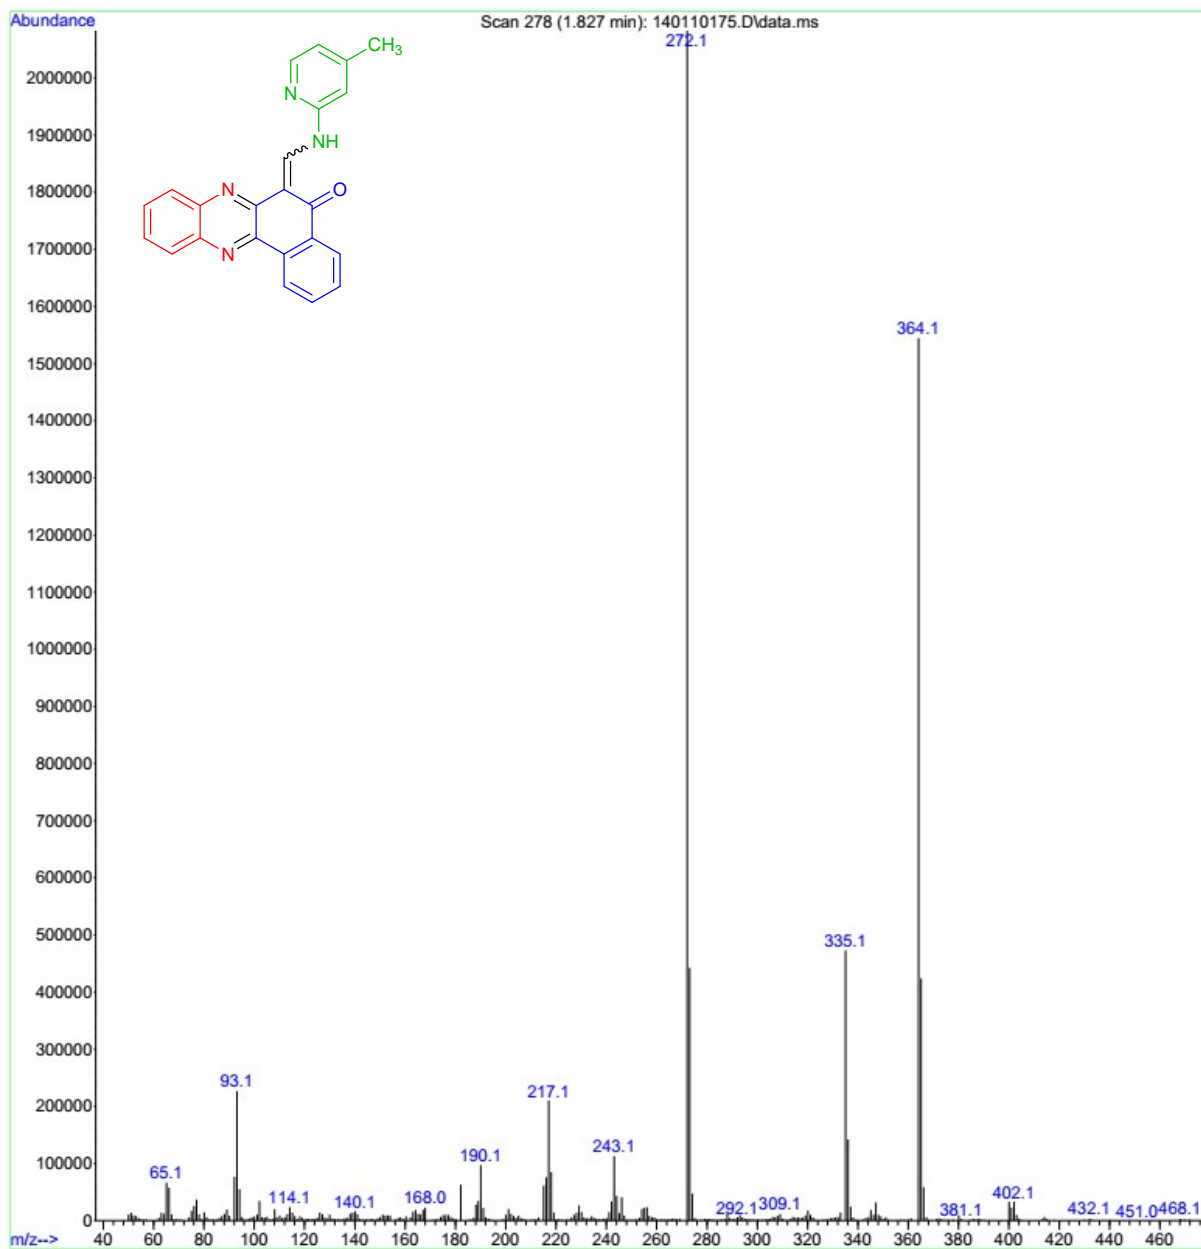

Mass spectrum of compound 6c

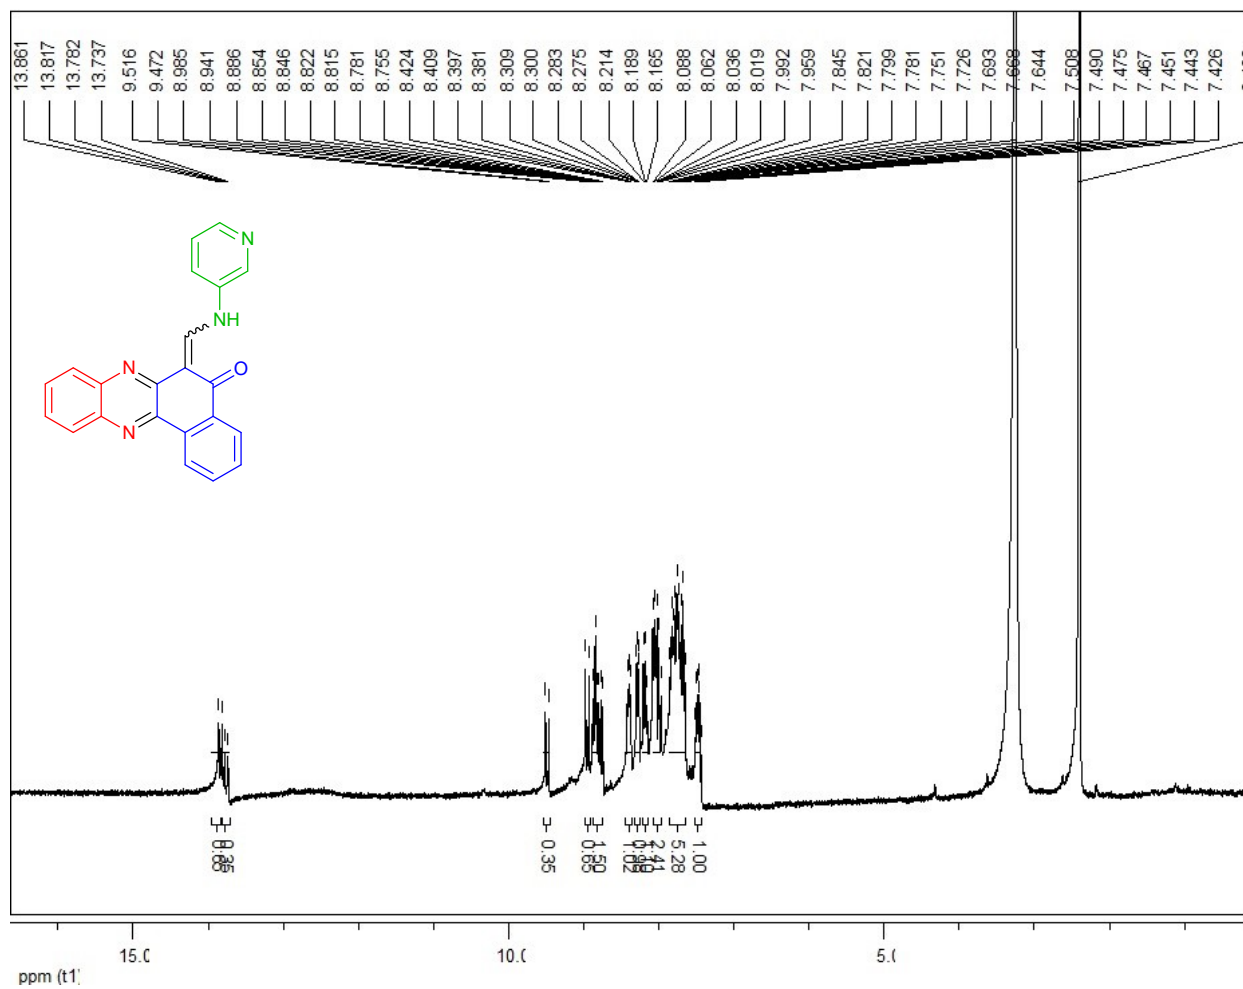

<sup>1</sup>H-NMR spectrum of compound **6d** (300 MHz, DMSO-*d*<sub>6</sub>)

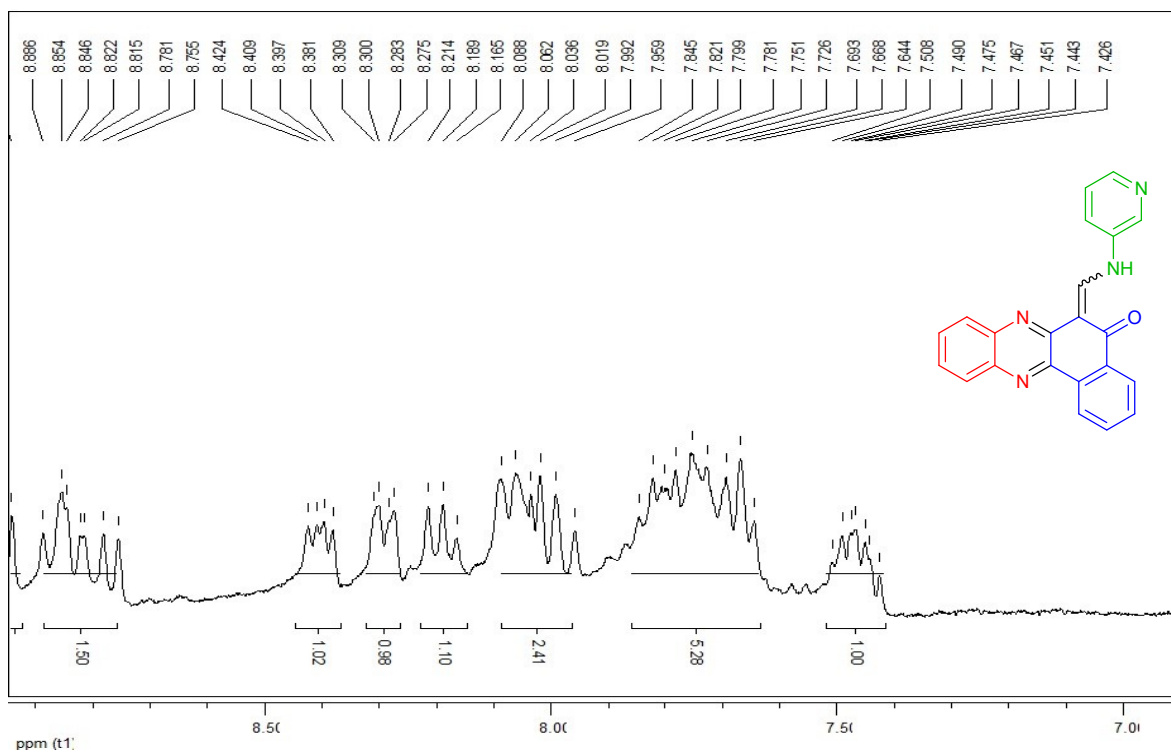

<sup>1</sup>H-NMR spectrum of compound **6d** (300 MHz, DMSO-*d*<sub>6</sub>)

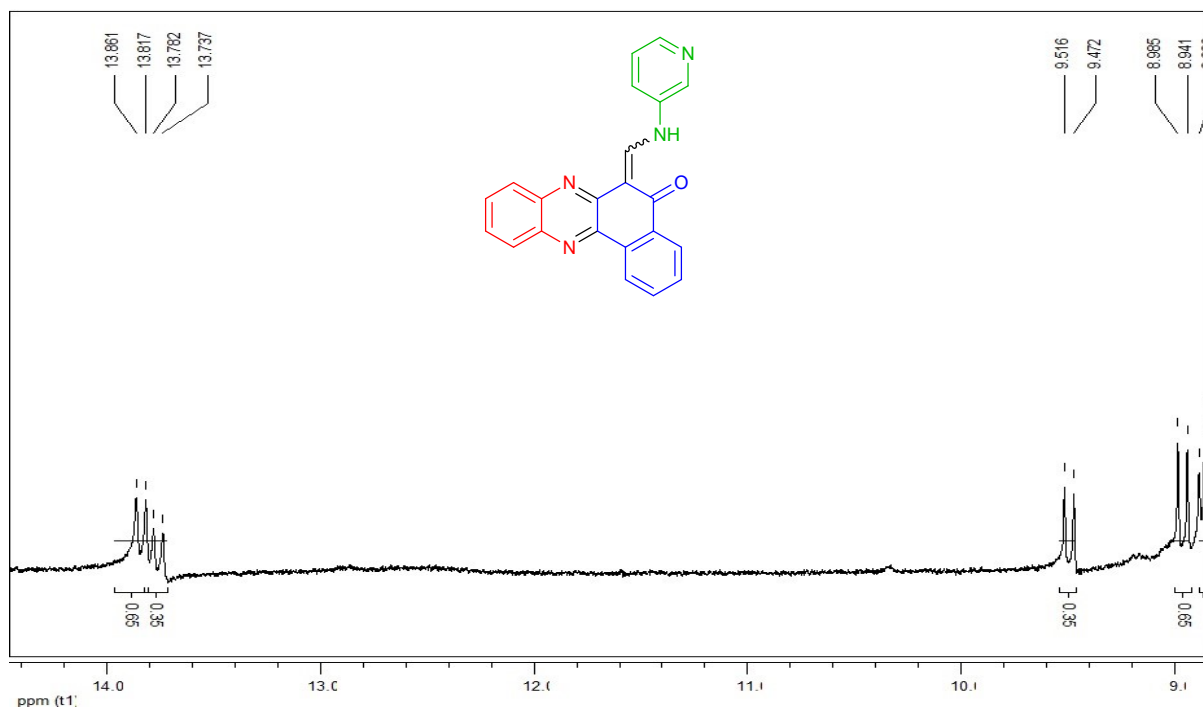

<sup>1</sup>H-NMR spectrum of compound **6d** (300 MHz, DMSO-*d*<sub>6</sub>)

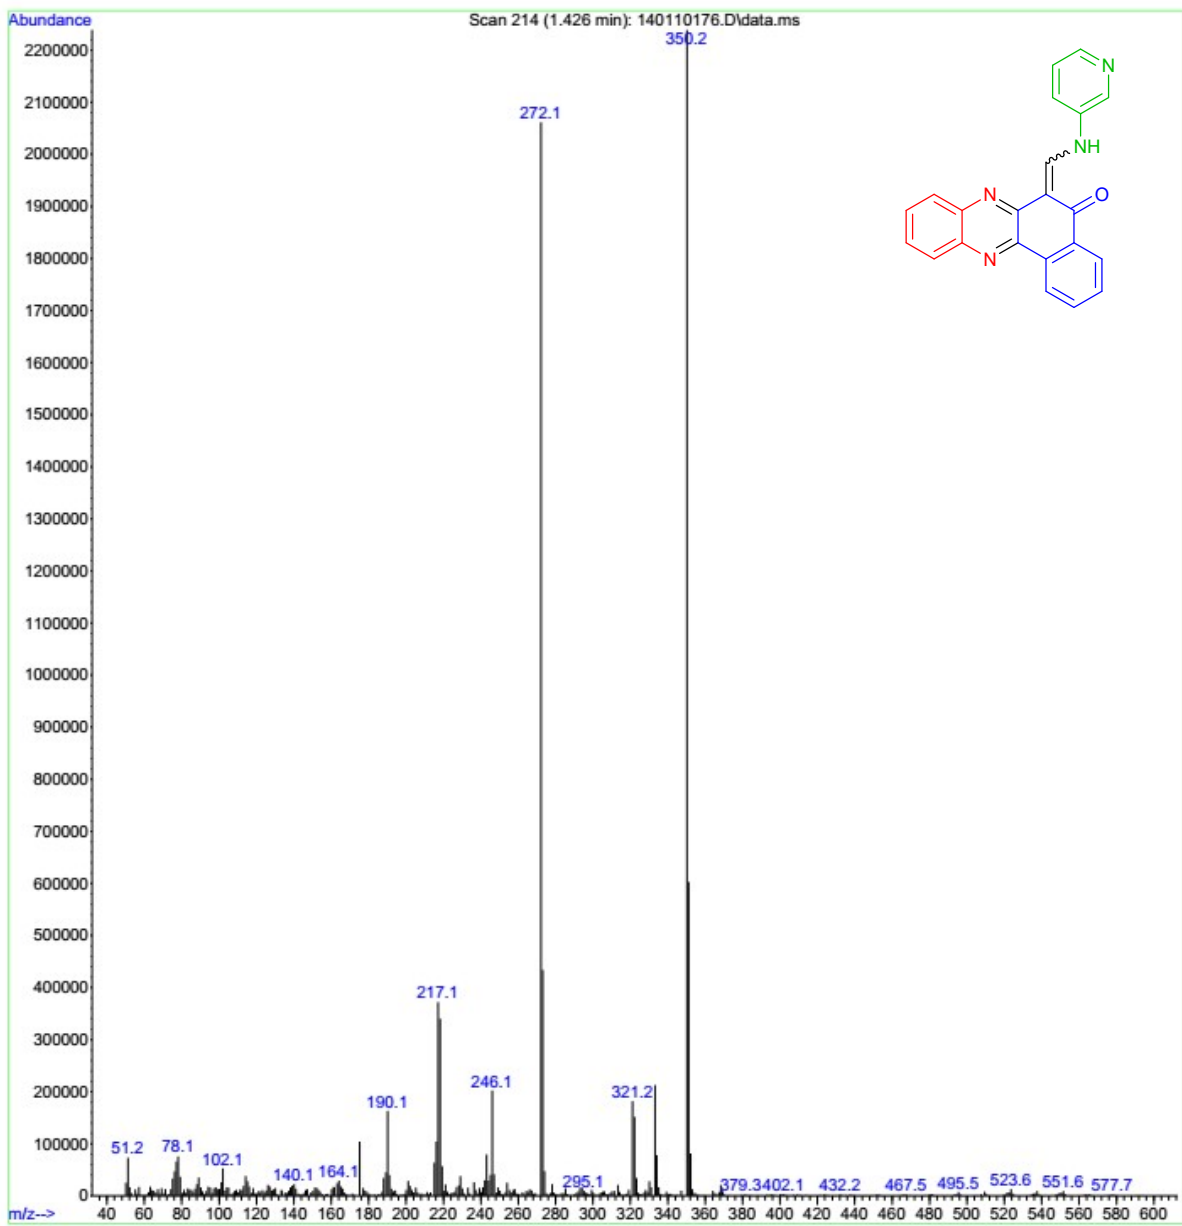

Mass spectrum of compound 6d

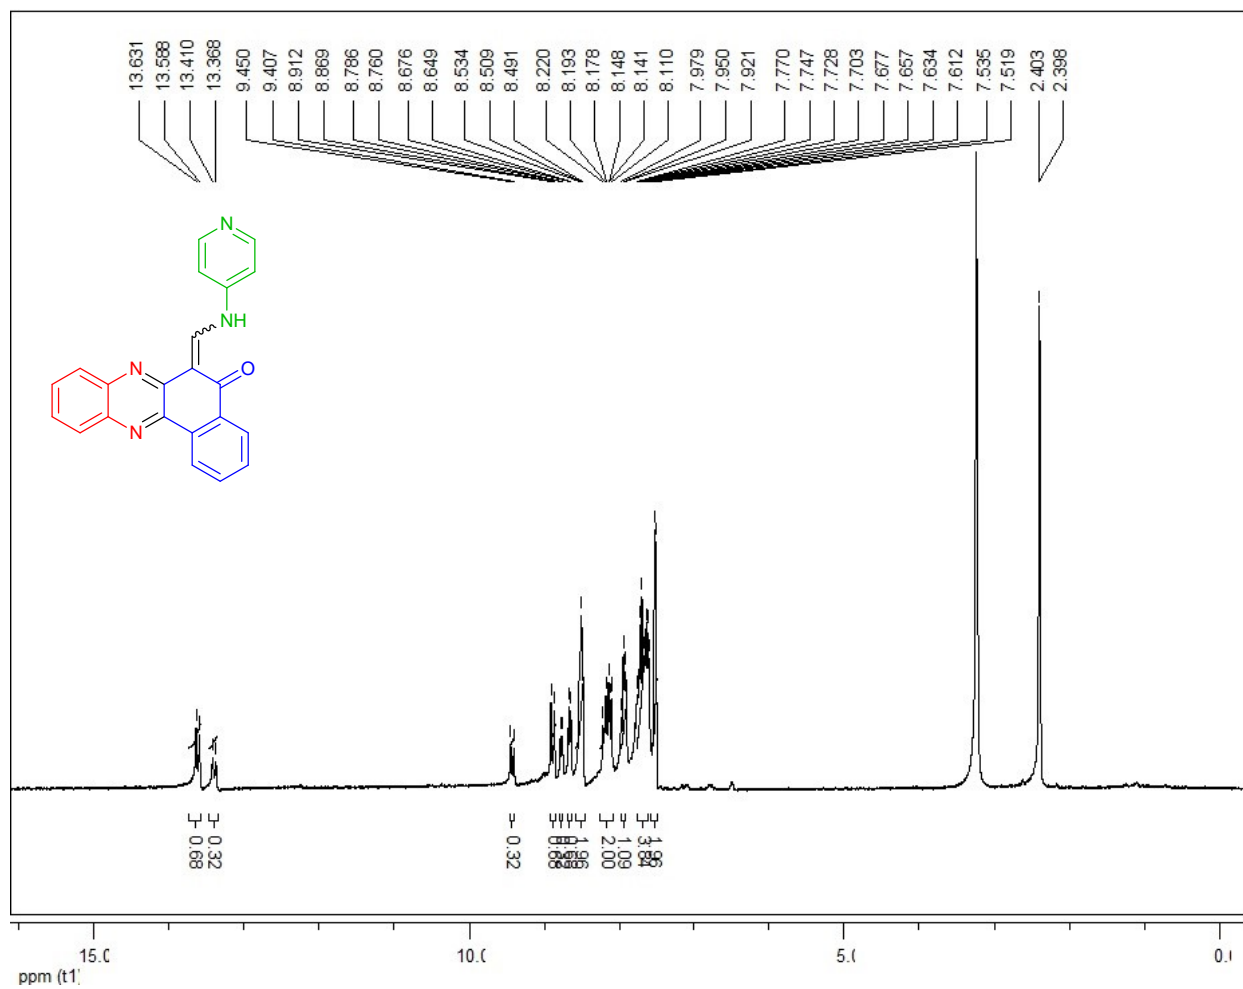

<sup>1</sup>H-NMR spectrum of compound 6e (300 MHz, DMSO-*d*<sub>6</sub>)

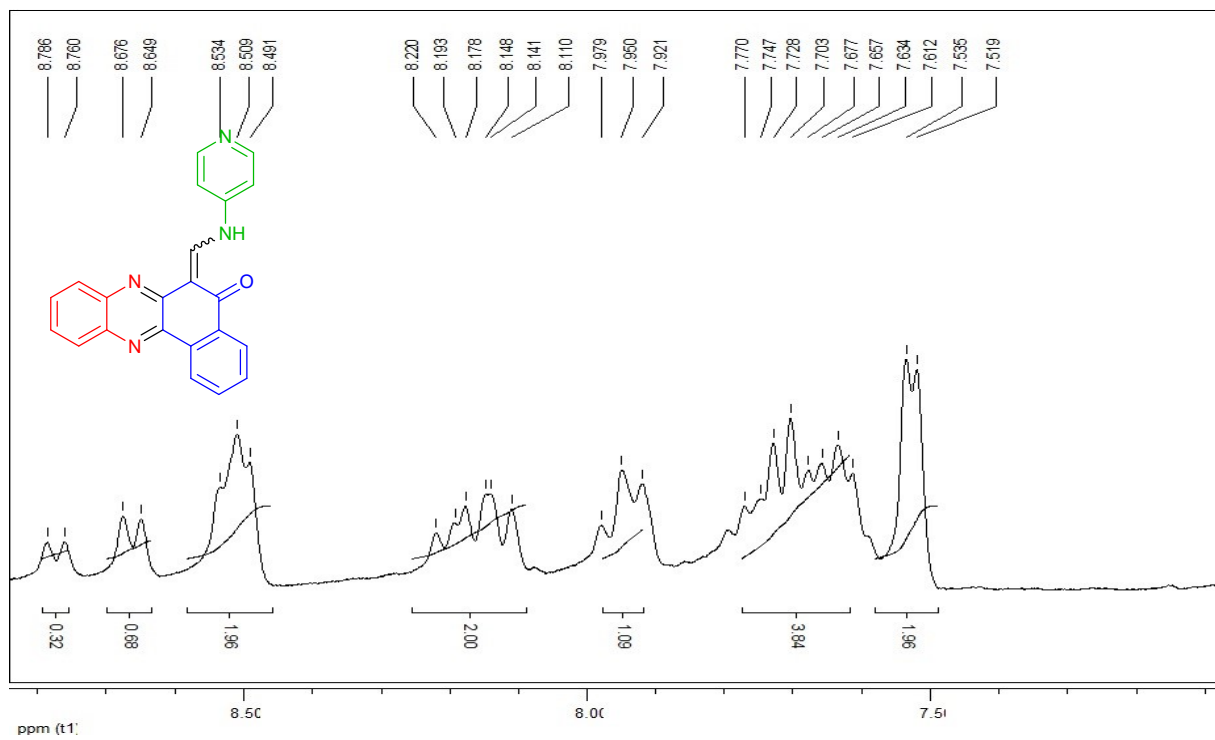

<sup>1</sup>H-NMR spectrum of compound **6e** (300 MHz, DMSO-*d*<sub>6</sub>)

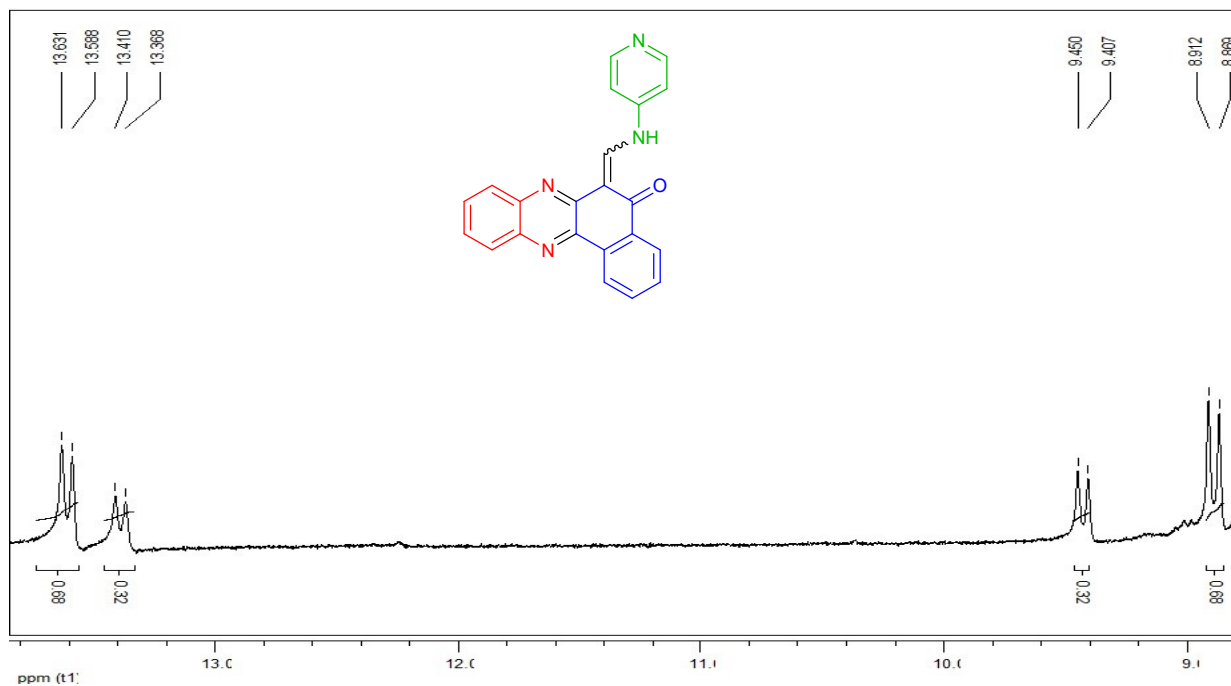

<sup>13</sup>C-NMR spectrum of compound **6e** (300 MHz, DMSO-*d*<sub>6</sub>)



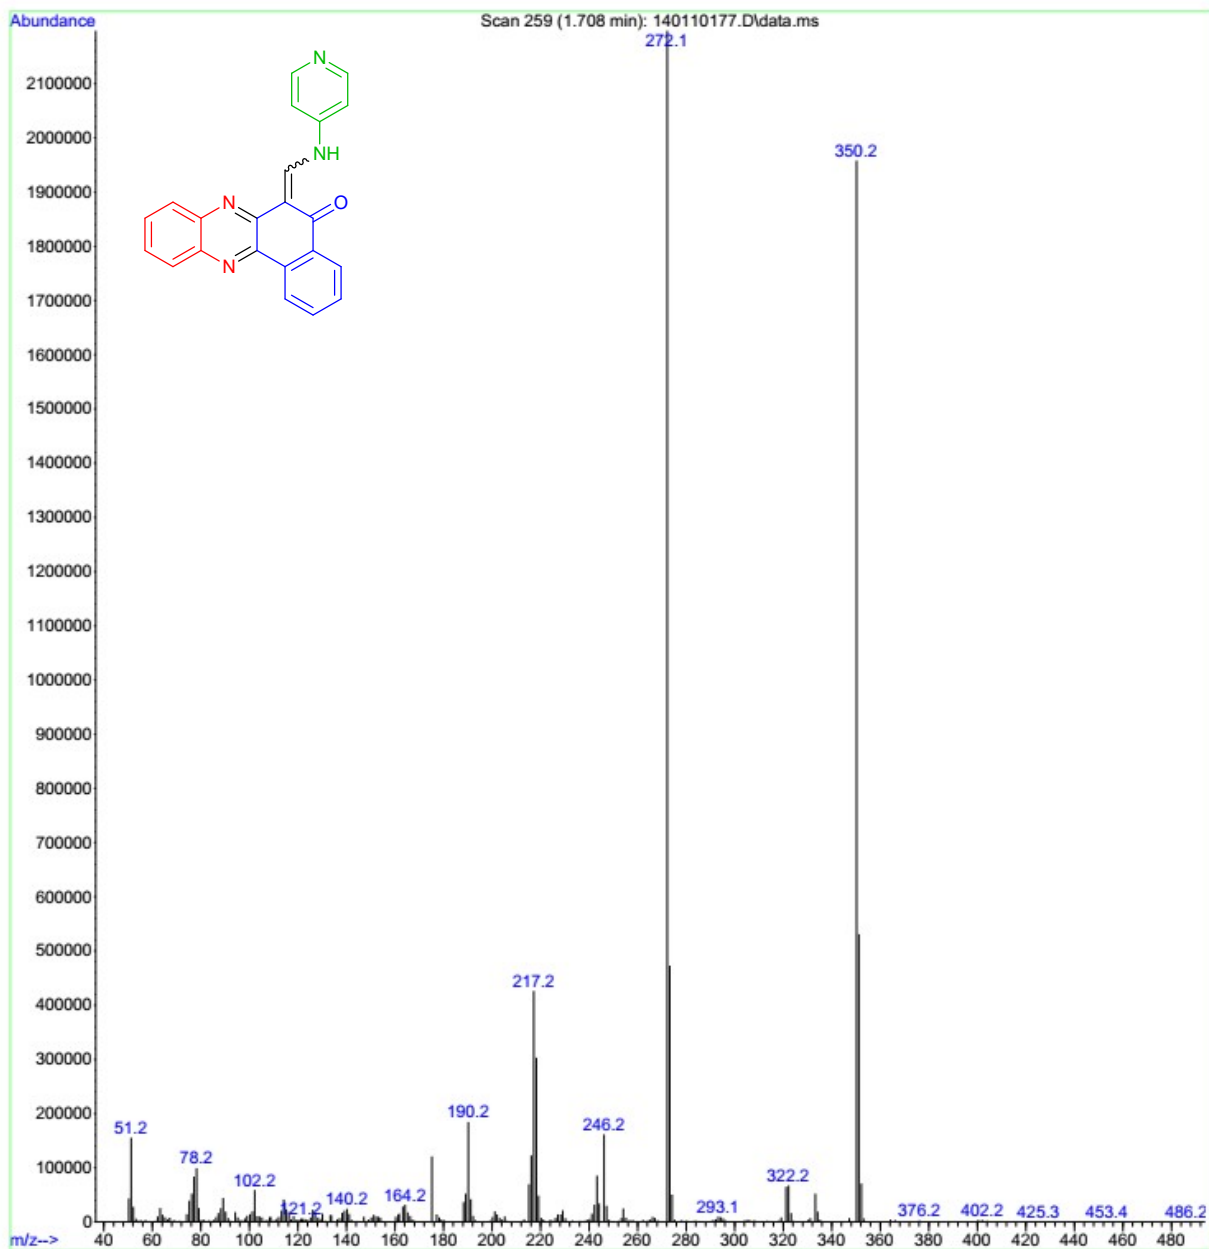

Mass spectrum of compound 6e

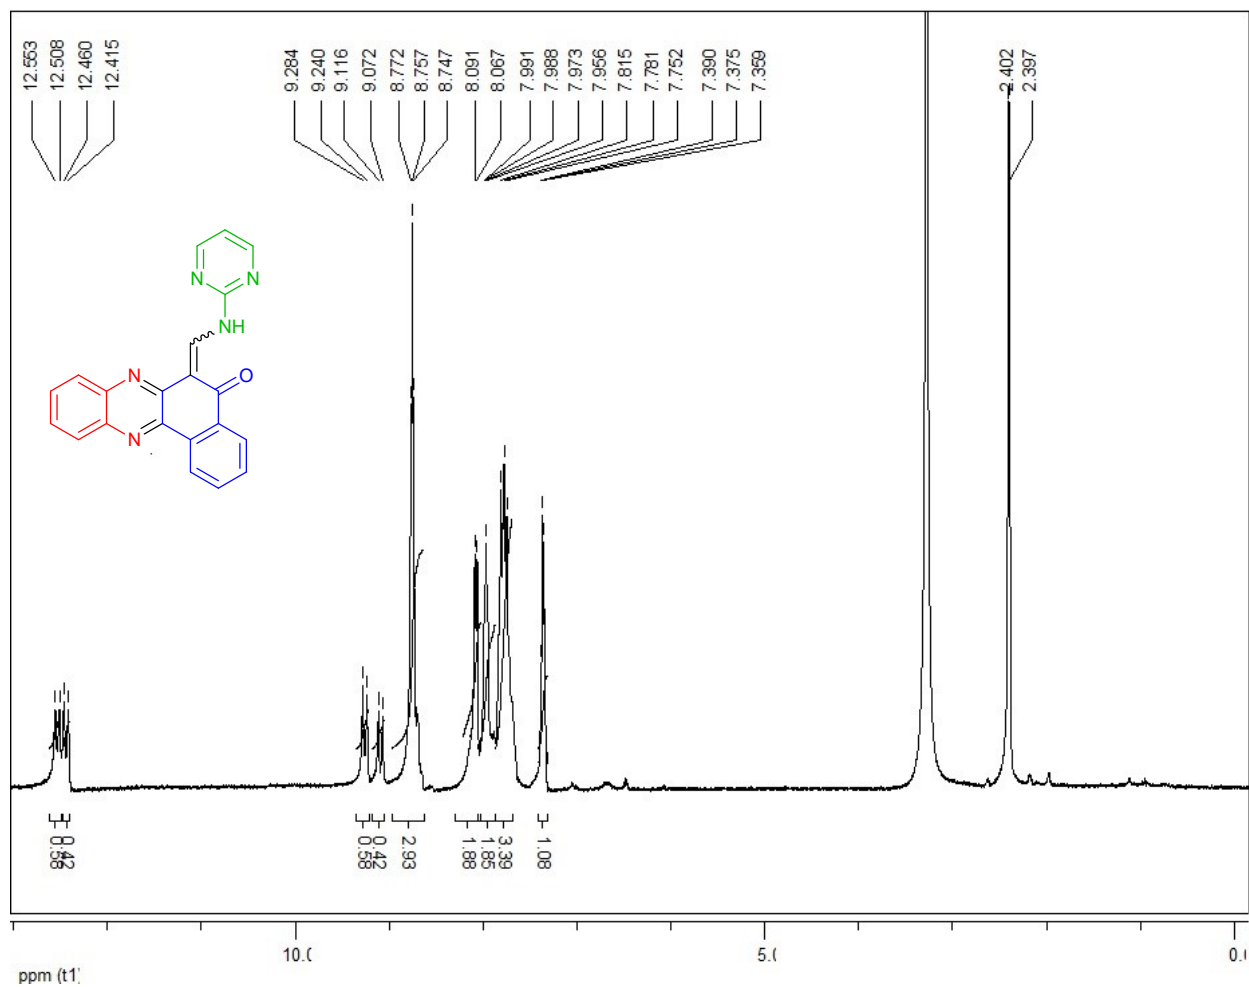

$^1\text{H-NMR}$  spectrum of compound **6f** (300 MHz,  $\text{DMSO-d}_6$ )

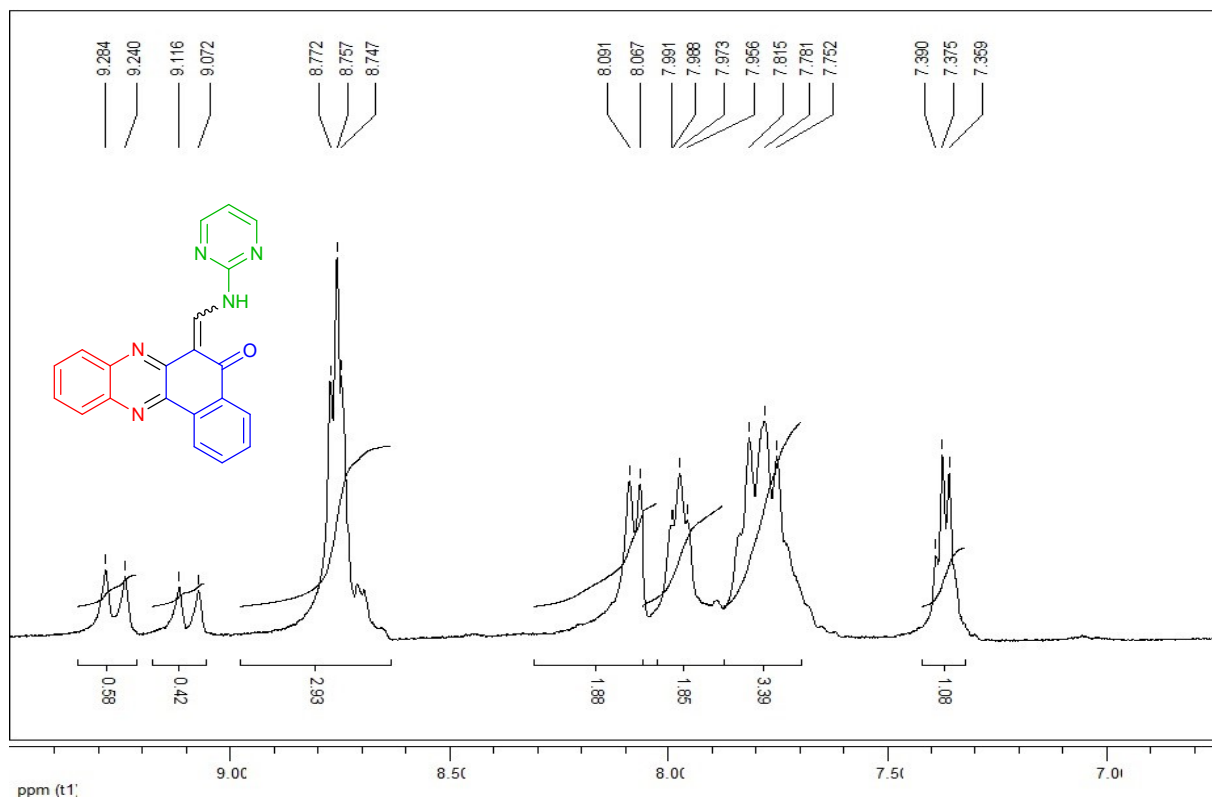

<sup>1</sup>H-NMR spectrum of compound **6f** (300 MHz, DMSO-*d*<sub>6</sub>)

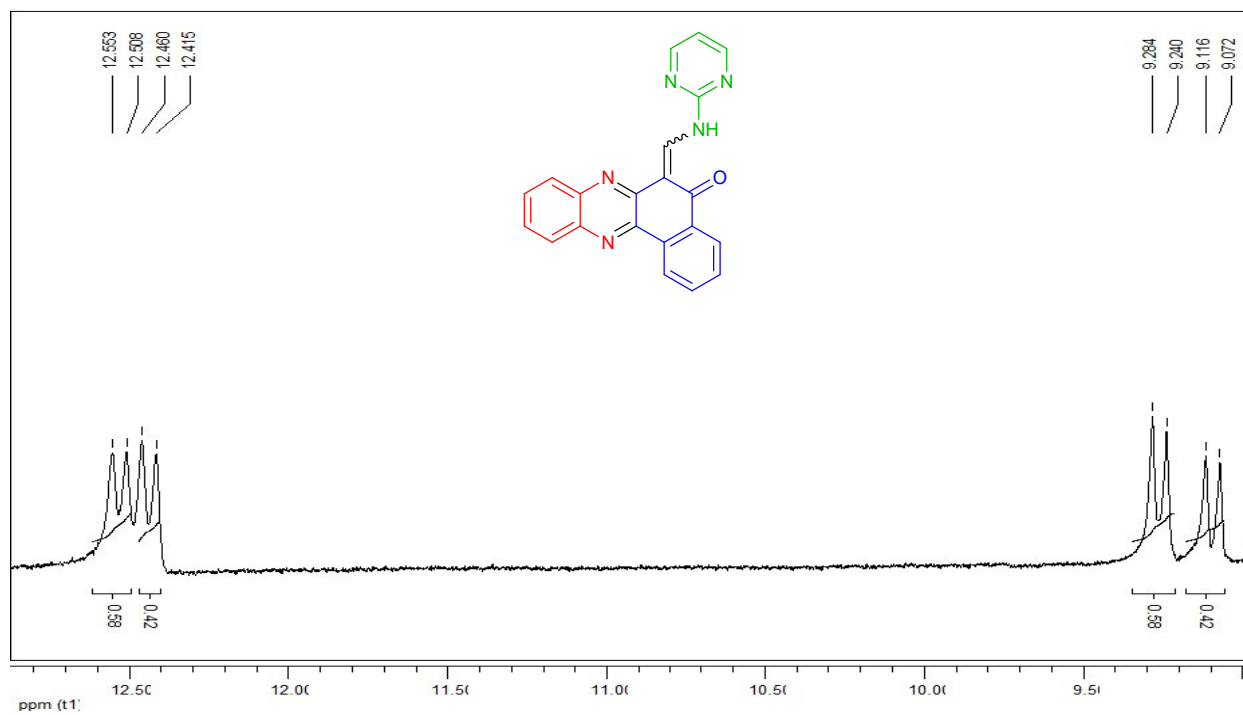

<sup>1</sup>H-NMR spectrum of compound **6f** (300 MHz, DMSO-*d*<sub>6</sub>)

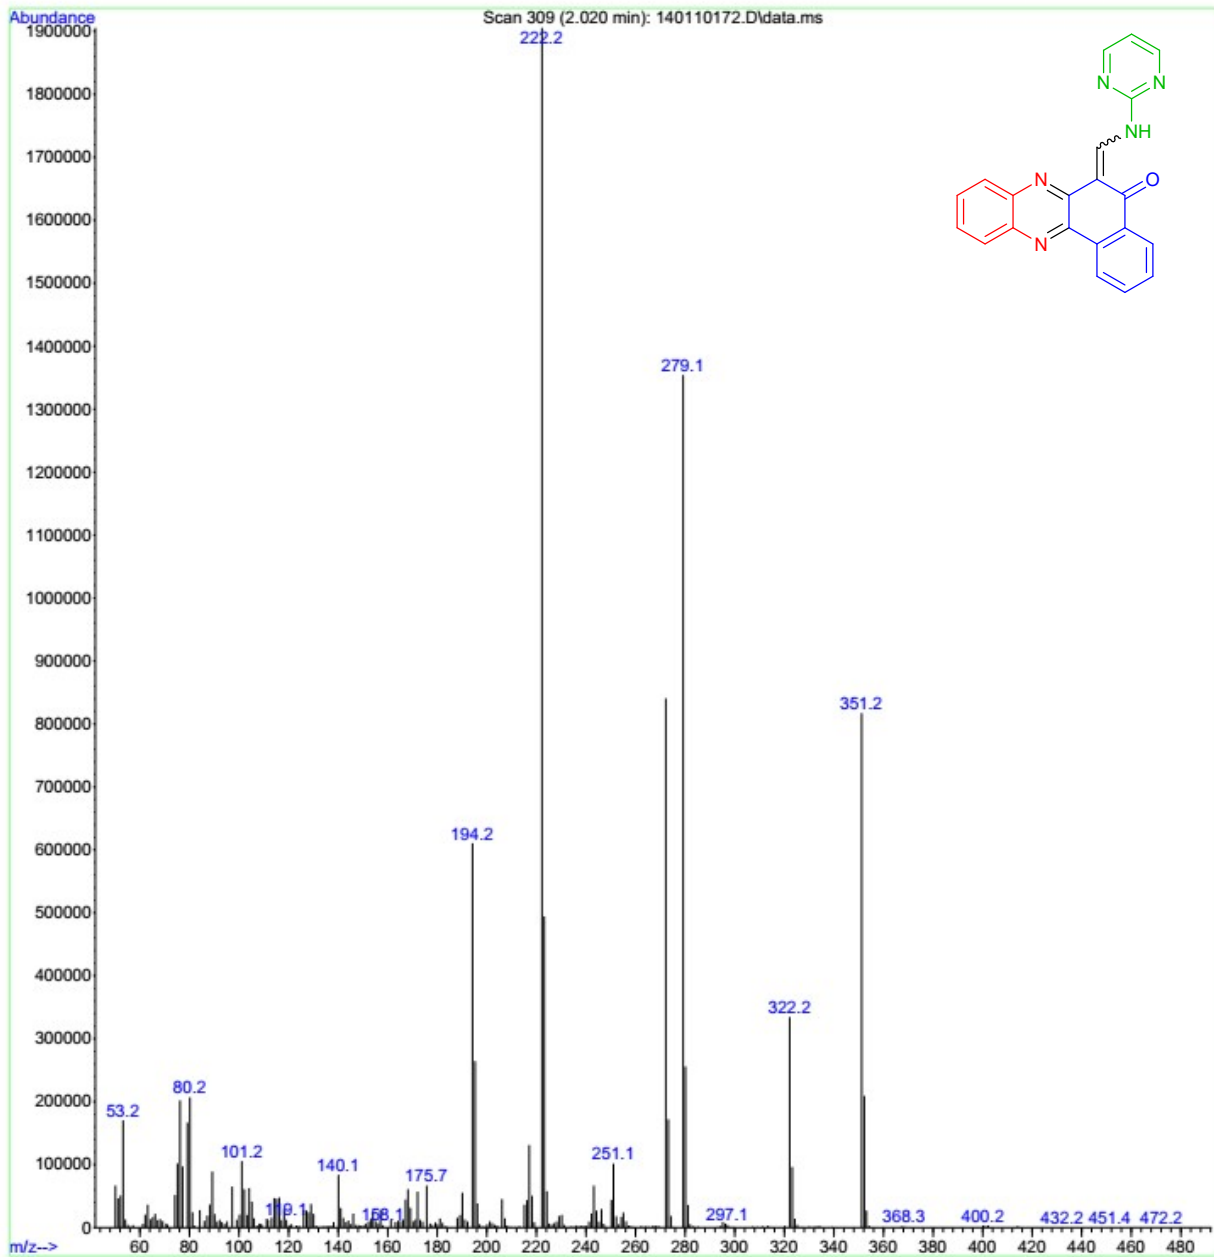

Mass spectrum of compound **6f**

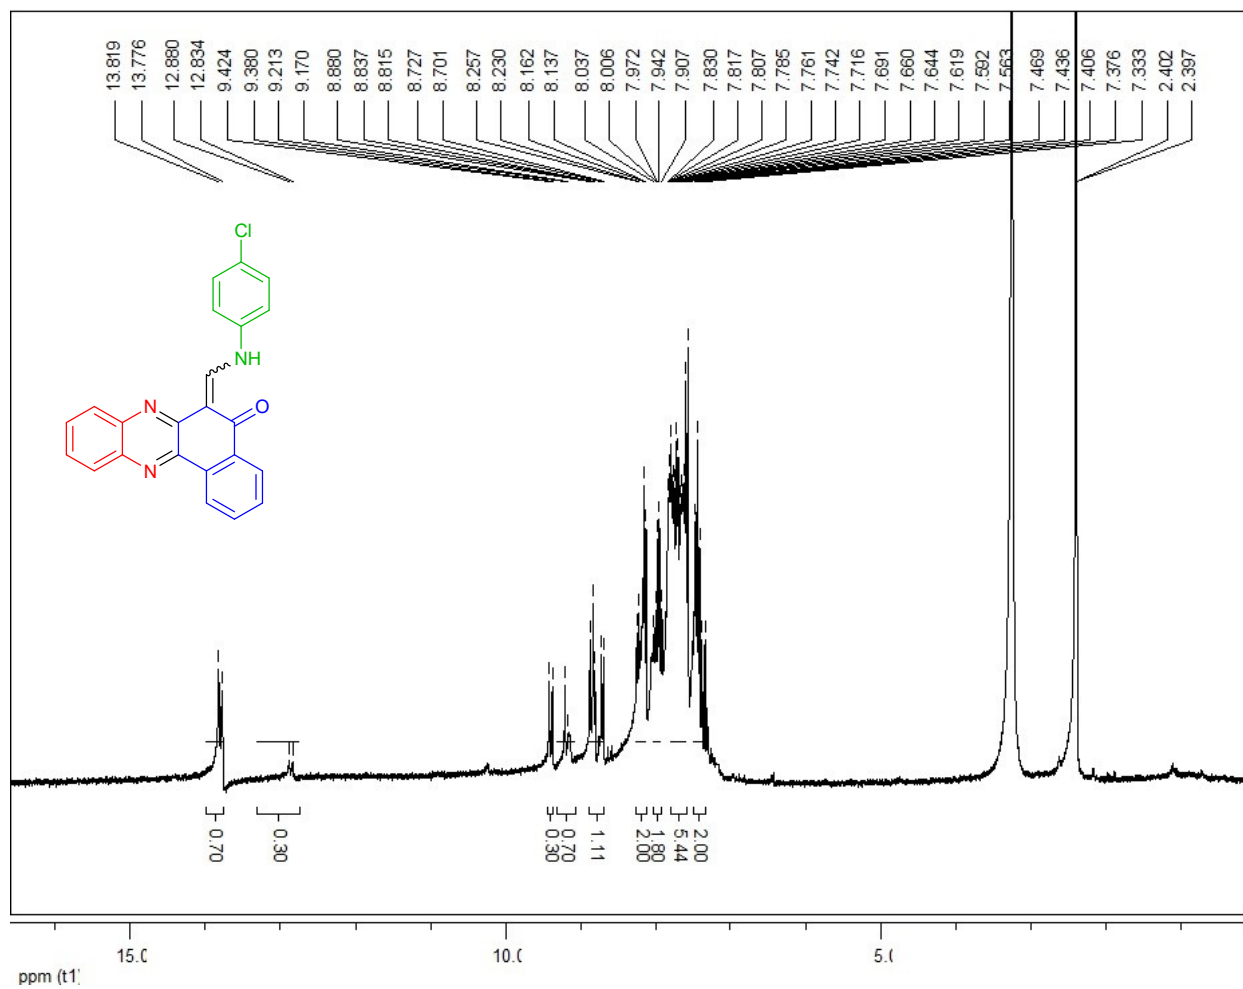

<sup>1</sup>H-NMR spectrum of compound 6g (300 MHz, DMSO-d<sub>6</sub>)

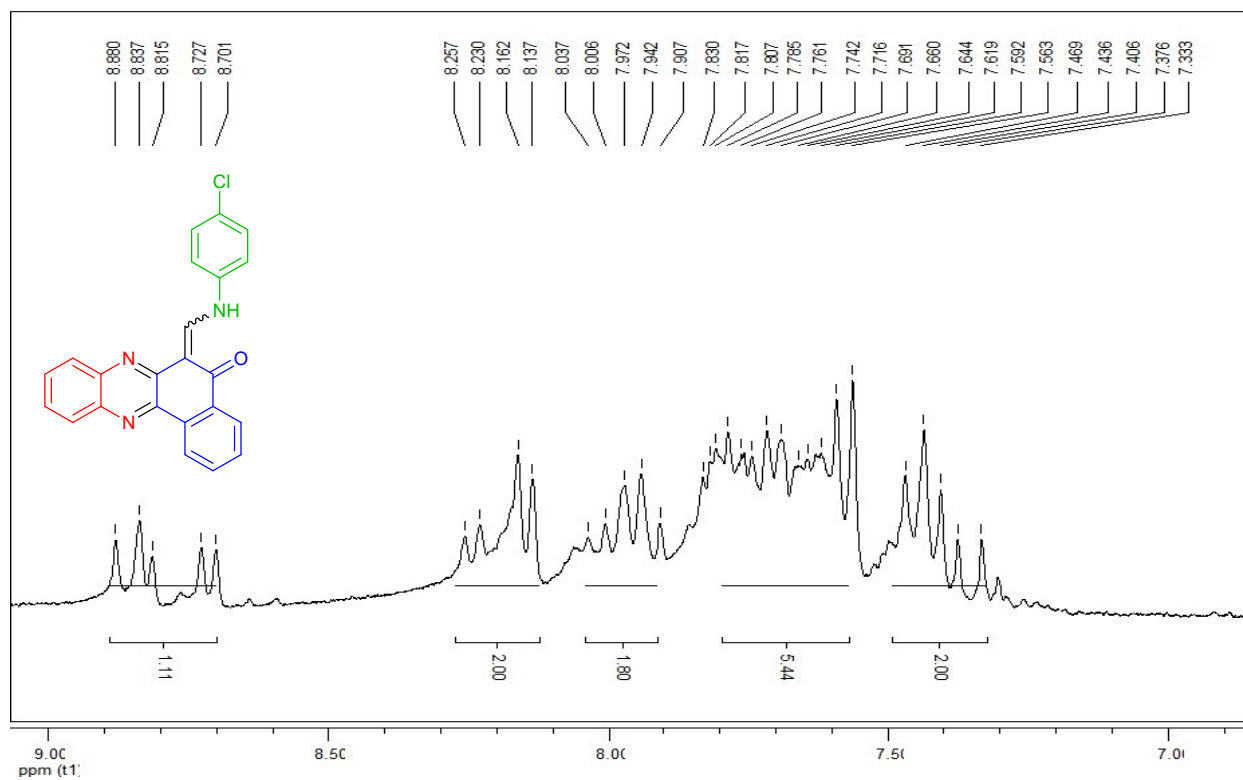

<sup>1</sup>H-NMR spectrum of compound **6g** (300 MHz, DMSO-*d*<sub>6</sub>)

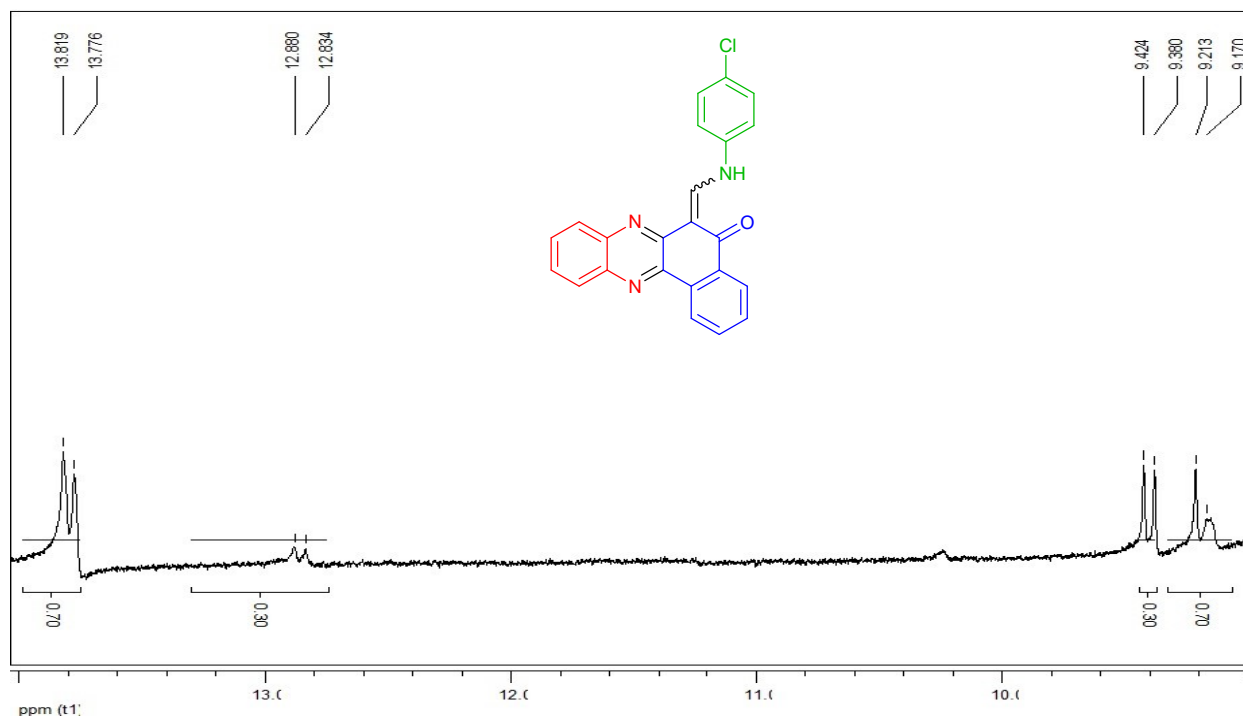

<sup>13</sup>C-NMR spectrum of compound **6g** (300 MHz, DMSO-*d*<sub>6</sub>)

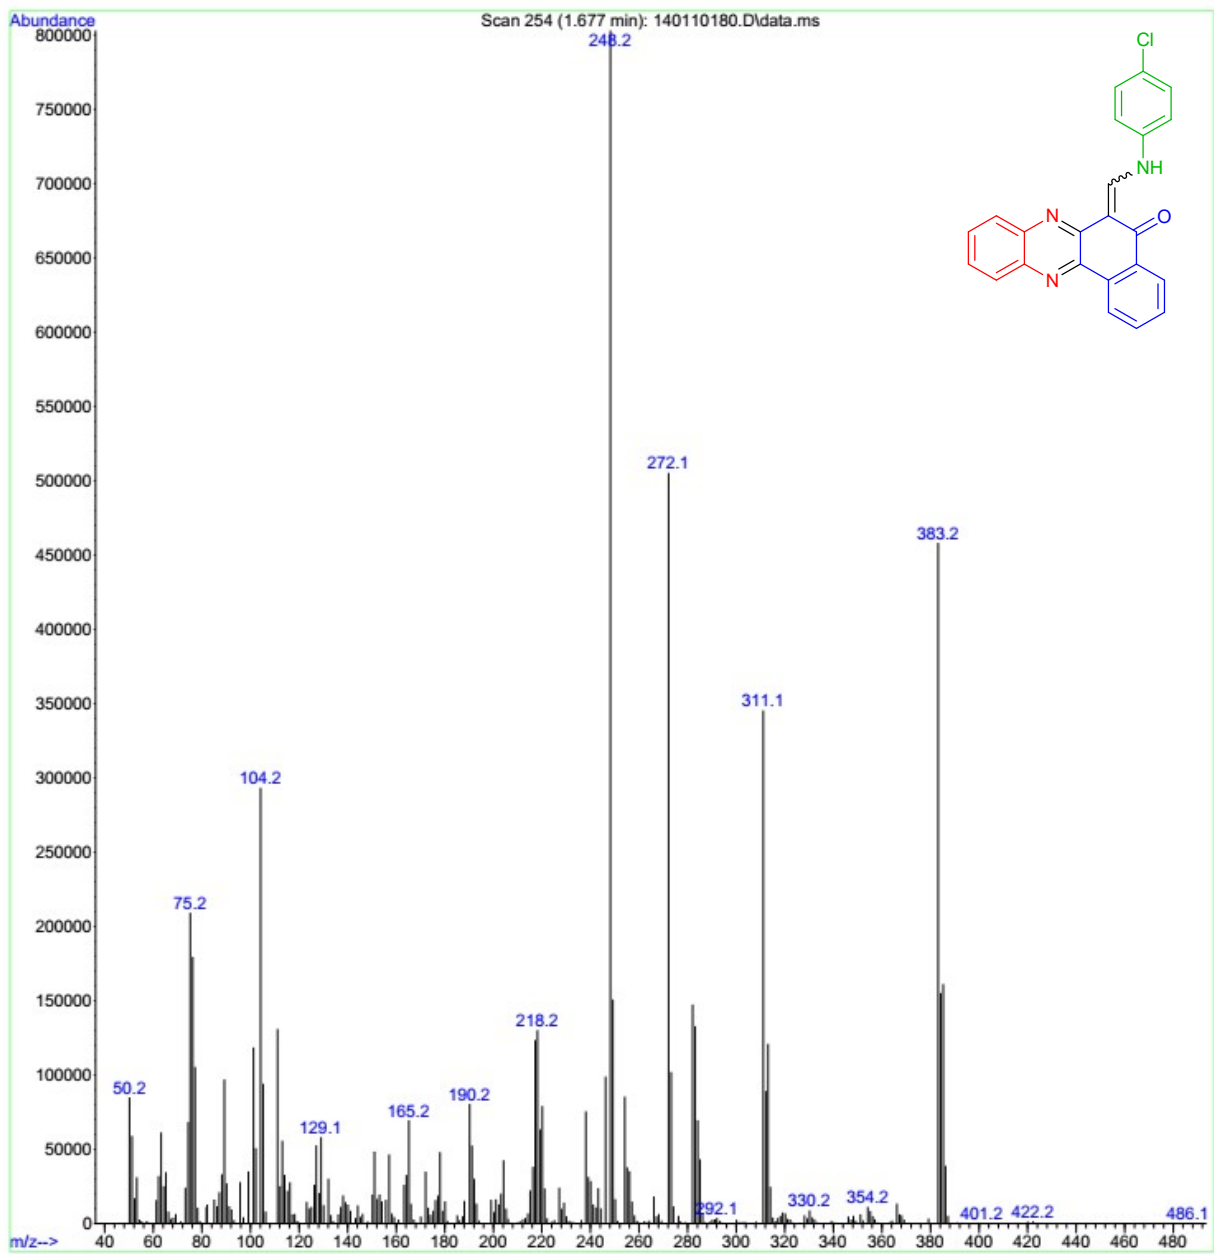

Mass spectrum of compound **6g**

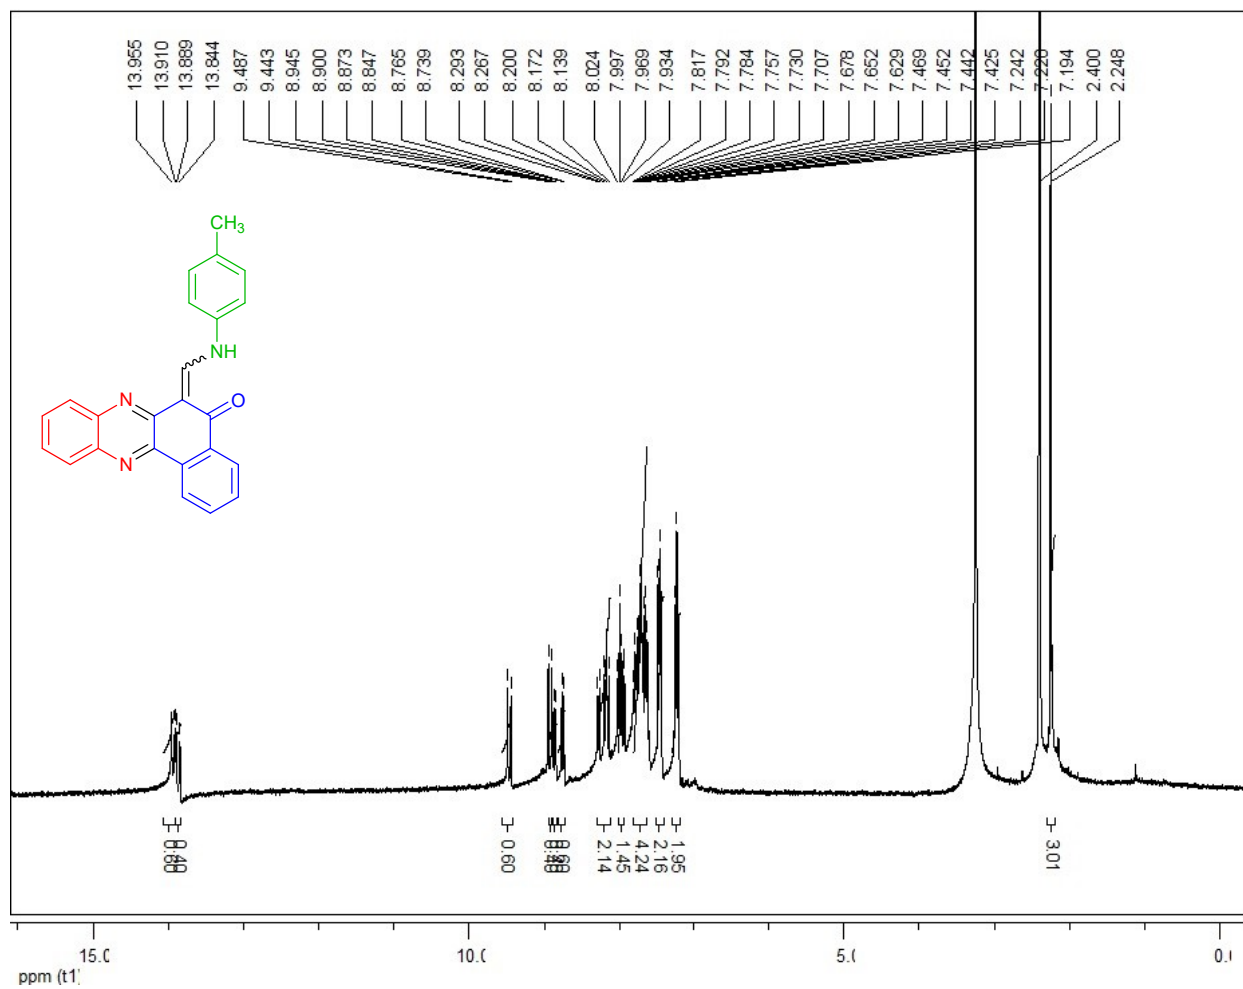

<sup>1</sup>H-NMR spectrum of compound 6h (300 MHz, DMSO-*d*<sub>6</sub>)



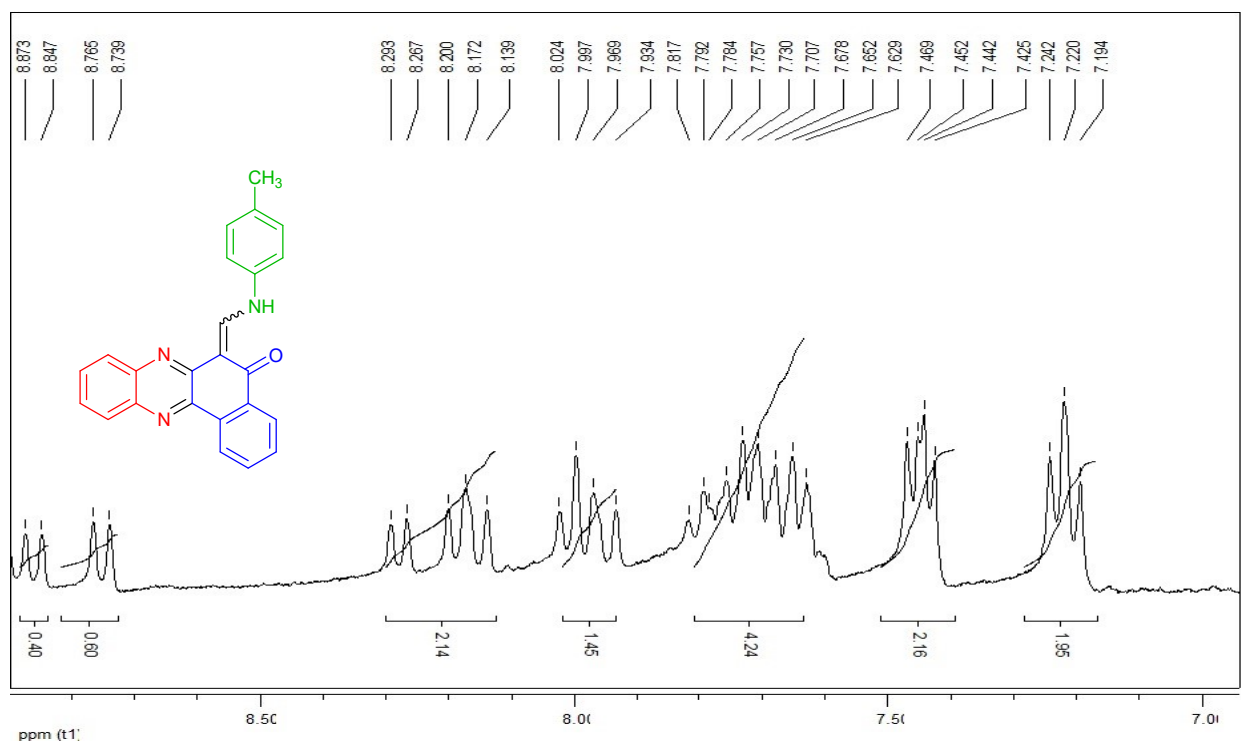

<sup>1</sup>H-NMR spectrum of compound 6h (300 MHz, DMSO-*d*<sub>6</sub>)

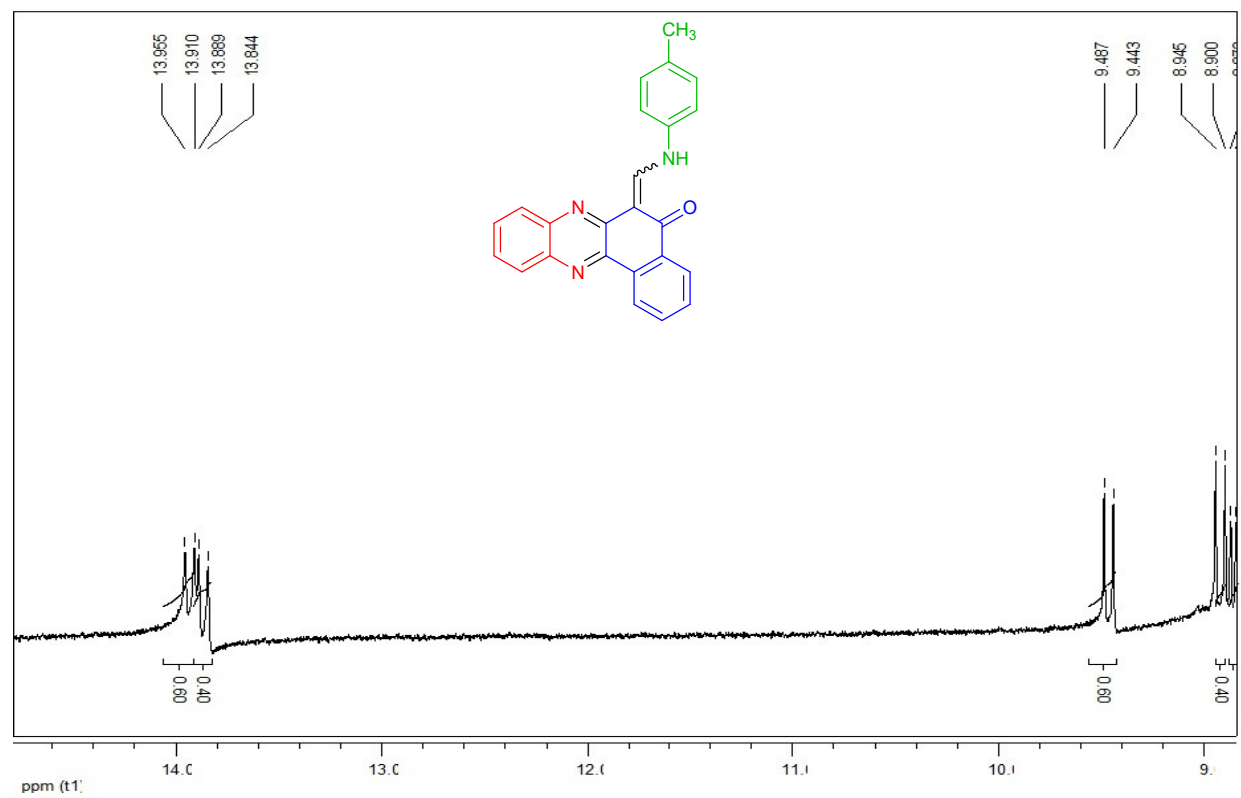

<sup>13</sup>C-NMR spectrum of compound 6h (300 MHz, DMSO-*d*<sub>6</sub>)

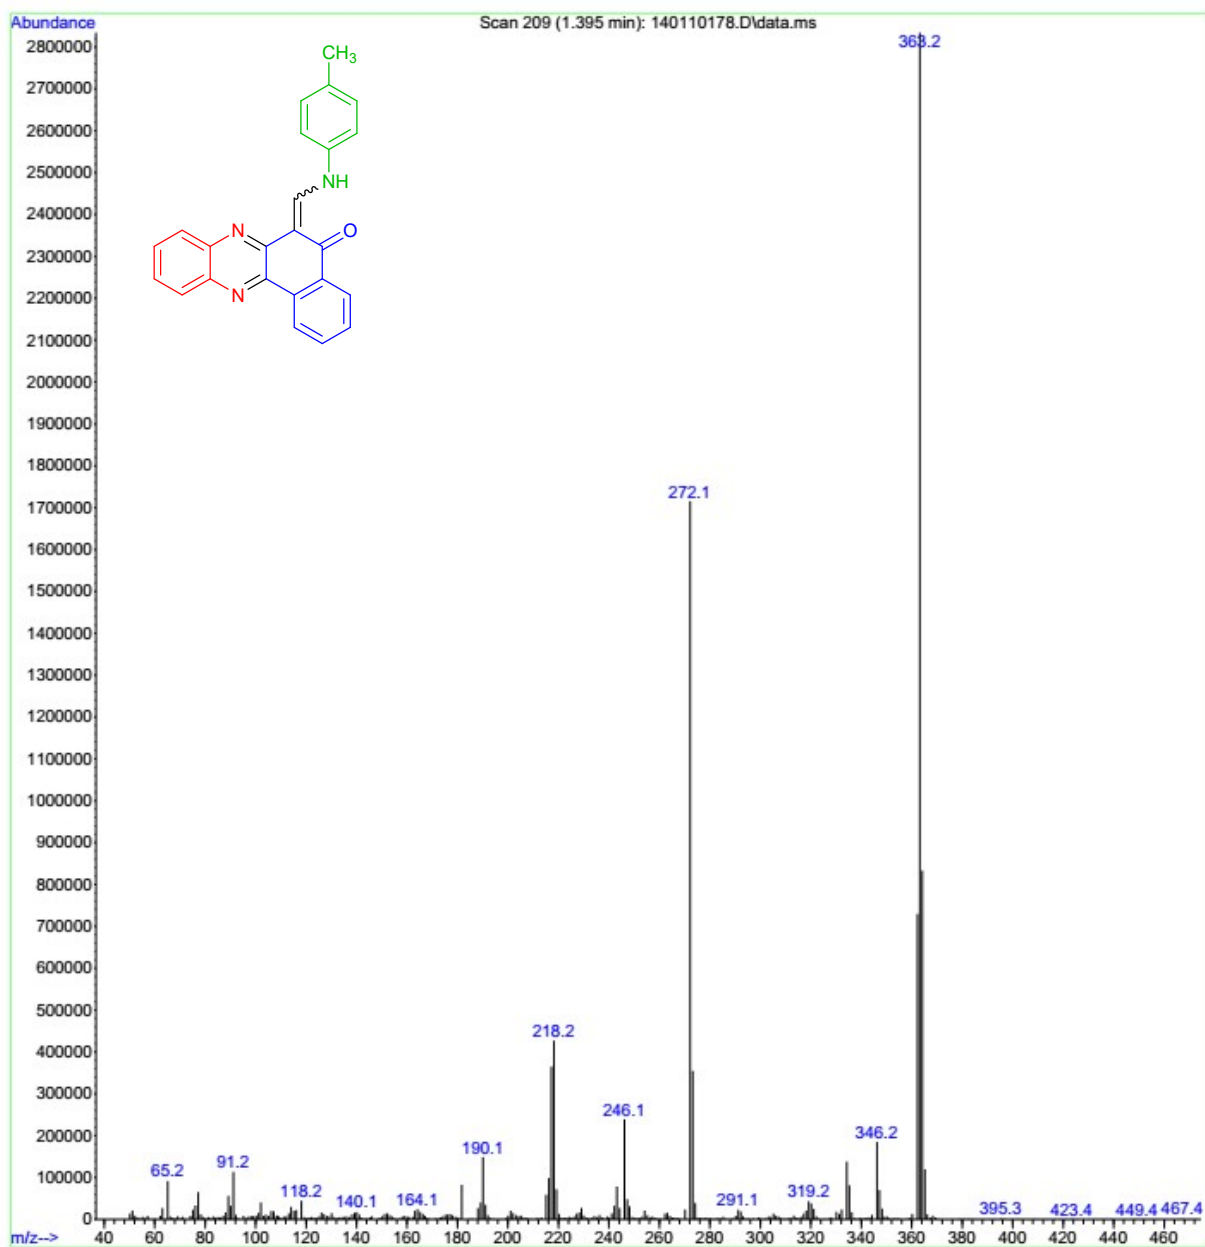

Mass spectrum of compound 6h

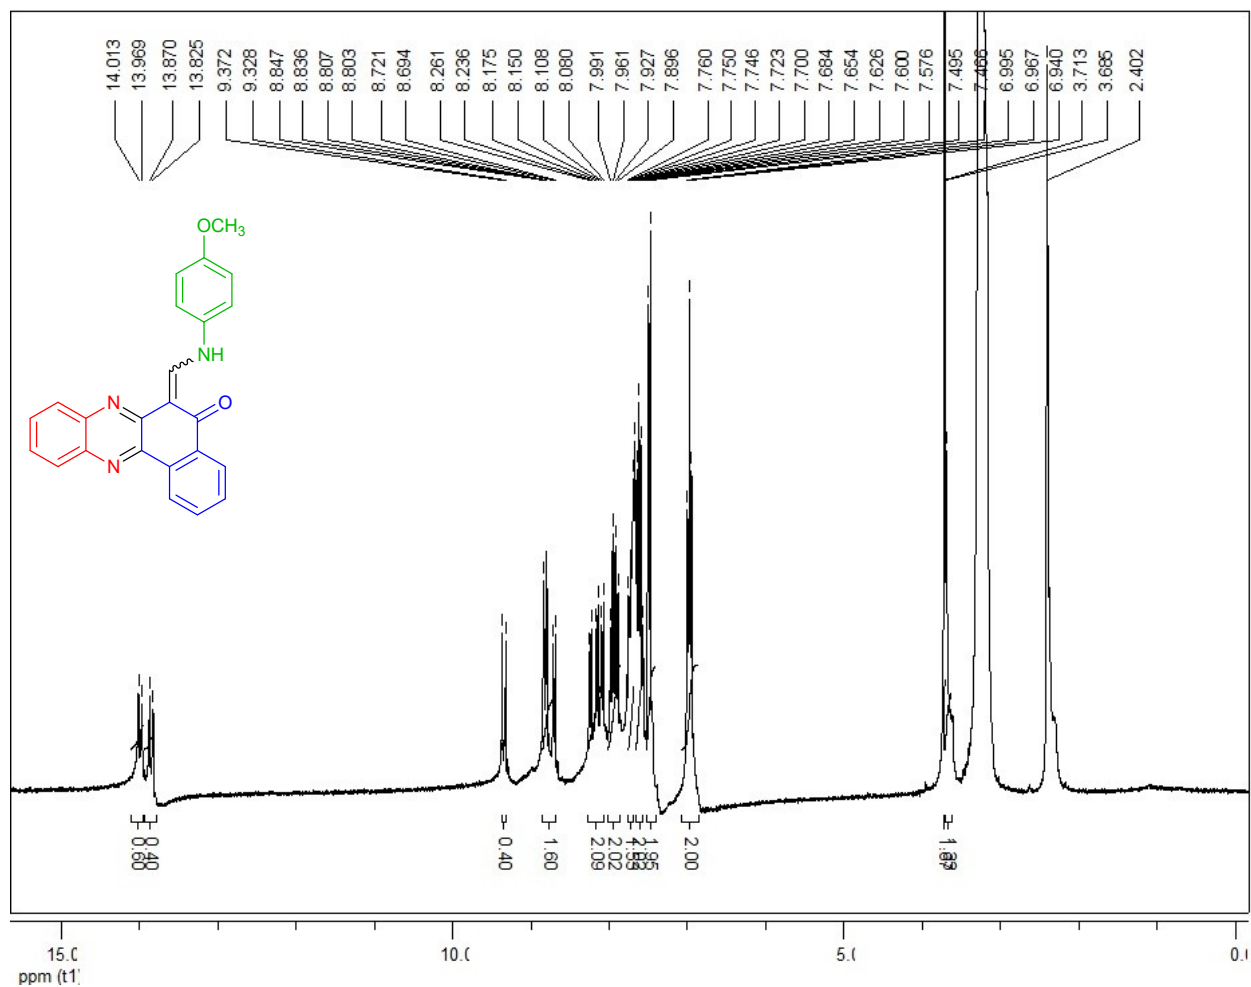

<sup>1</sup>H-NMR spectrum of compound **6i** (300 MHz, DMSO-*d*<sub>6</sub>)

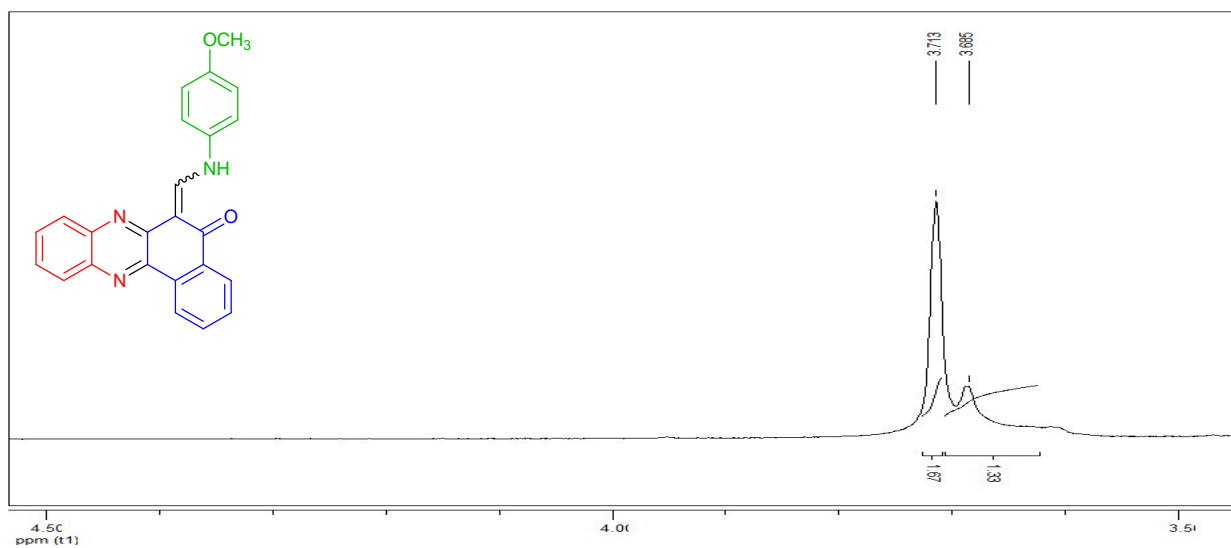

<sup>1</sup>H-NMR spectrum of compound **6i** (300 MHz, DMSO-*d*<sub>6</sub>)

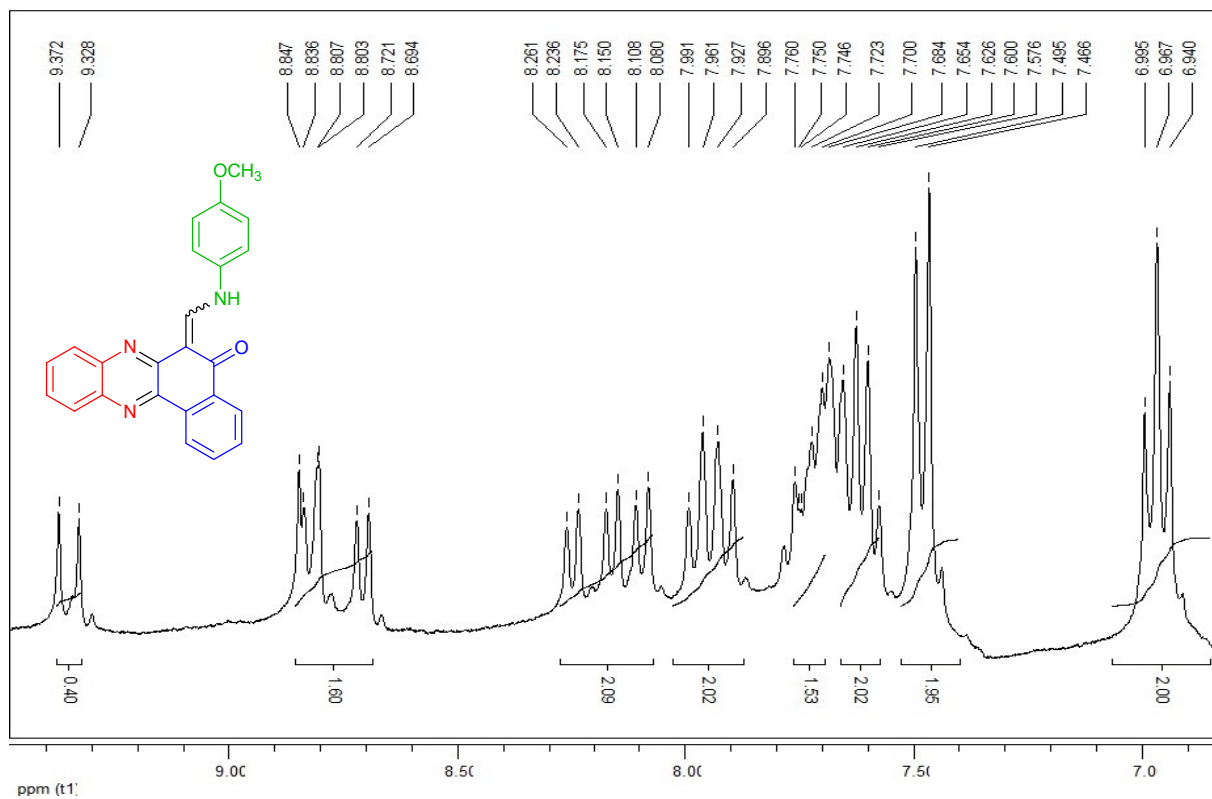

<sup>1</sup>H-NMR spectrum of compound **6i** (300 MHz, DMSO-*d*<sub>6</sub>)

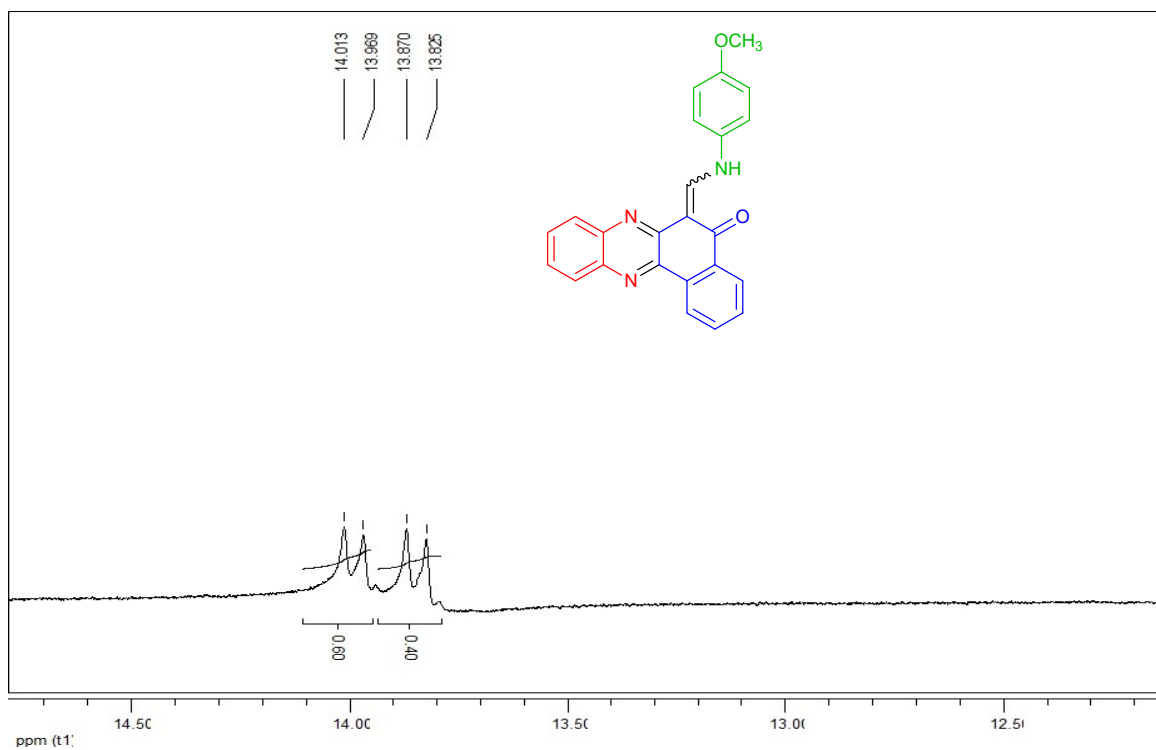

<sup>13</sup>C-NMR spectrum of compound **6i** (300 MHz, DMSO-*d*<sub>6</sub>)

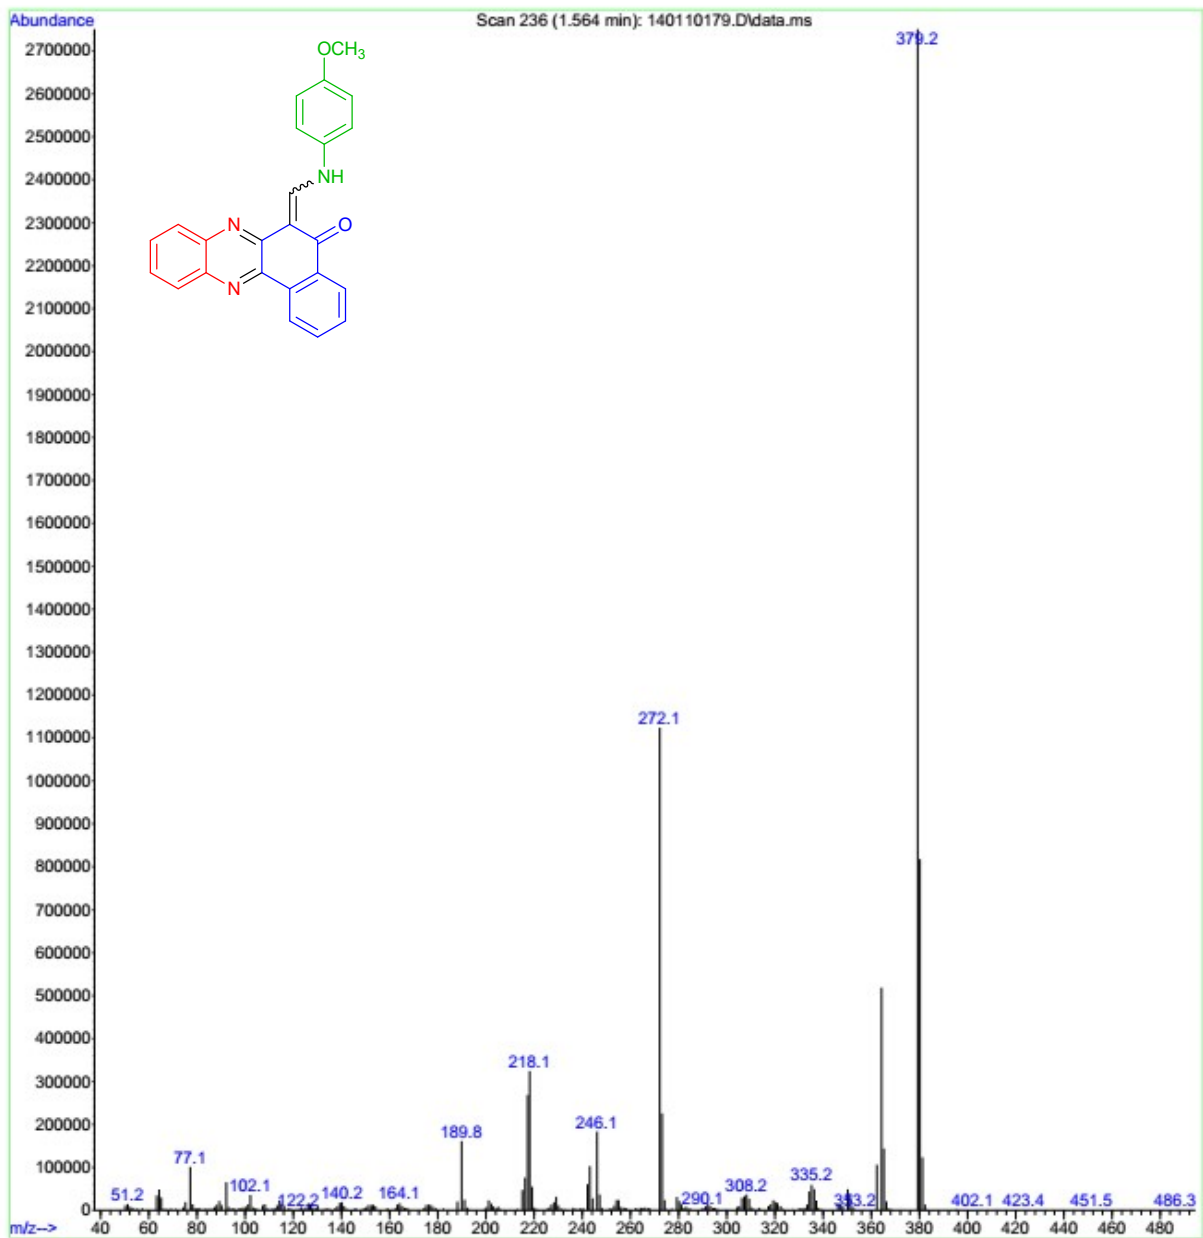

Mass spectrum of compound 6i
